# Supplementary material
Source: Royal Society of Chemistry journal article supplement (doi:10.1039/d6cc01831a)
Supplement: d6cc01831a1.pdf [file d6cc01831a1.pdf]

*Electronic Supplementary Information*

# **Hydrosilylation of $\omega$ -hydroxyalkenes catalysed with 2-methacryloyloxyethyl-phosphorylcholine-protected ruthenium nanoparticles**

Mana Yamamoto,<sup>a‡</sup> Yuuki Tanioka,<sup>a‡</sup> Sakiko Miyamoto,<sup>a</sup> Mizuho Fujisawa,<sup>a</sup> Tatsuki Nagata,<sup>a</sup>  
Yuki Kimura,<sup>a</sup> Kazuki Tabaru,<sup>a</sup> Honami Iguchi,<sup>a</sup> Takeyuki Suzuki,<sup>b</sup> Takashi Toyao,<sup>c</sup> Zen Maeno,<sup>d</sup>  
Ken-ichi Shimizu,<sup>c</sup> Takeshi Watanabe,<sup>e</sup> Yasuhiko Iwasaki,<sup>a</sup> and Yasushi Obora<sup>a\*</sup>

<sup>a</sup> Department of Chemistry and Materials Engineering, Faculty of Chemistry, Materials and  
Bioengineering, Kansai University, Suita, Osaka 564-8680, Japan

<sup>b</sup> Comprehensive Analysis Centre, SANKEN, The University of Osaka, Ibaraki, Osaka 567-0047, Japan

<sup>c</sup> Institute for Catalysis, Hokkaido University, Sapporo, Hokkaido 001-0021, Japan

<sup>d</sup> School of Advanced Engineering, Kogakuin University, Hachioji, Tokyo 192-0015, Japan

<sup>e</sup> Japan Synchrotron Radiation Research Institute, Sayo-gun, Hyogo 679-5198, Japan

\* obora@kansai-u.ac.jp

## **Table of Contents**

|                                                                                                                                                        |            |
|--------------------------------------------------------------------------------------------------------------------------------------------------------|------------|
| <b>1. General information.....</b>                                                                                                                     | <b>S3</b>  |
| <b>2. Experimental procedures .....</b>                                                                                                                | <b>S4</b>  |
| <b>3. Results of Fluorescence (PL) and UV-visible (UV-Vis) spectroscopic analyses.....</b>                                                             | <b>S7</b>  |
| <b>4. 1H- and 31P-NMR measurements of the interaction between -OH and MPC .....</b>                                                                    | <b>S8</b>  |
| <b>5. A study of MPC as an additive.....</b>                                                                                                           | <b>S14</b> |
| <b>6. X-ray photoelectron spectroscopy (XPS) measurements of (PC-SH)Ru NPs after<br/>reaction with varying alkene (1a)-to-silane (2a) ratios .....</b> | <b>S15</b> |
| <b>7. Comparative reactivity .....</b>                                                                                                                 | <b>S17</b> |
| <b>8. Unsuccessful substrates.....</b>                                                                                                                 | <b>S19</b> |

|                                                                                                         |            |
|---------------------------------------------------------------------------------------------------------|------------|
| <b>9. Results of Small-Angle X-ray Scattering (SAXS) analysis .....</b>                                 | <b>S20</b> |
| <b>10. Results of Dynamic Light Scattering (DLS) analyses .....</b>                                     | <b>S21</b> |
| <b>11. Recycling experiments .....</b>                                                                  | <b>S21</b> |
| <b>12. Results of Fourier Transform Infrared Spectroscopy (FT-IR) analyses .....</b>                    | <b>S22</b> |
| <b>13. Results of Thermogravimetric (TG) analysis .....</b>                                             | <b>S22</b> |
| <b>14. Results of Inductively Coupled Plasma Optical Emission Spectrometry (ICP-OES) analysis .....</b> | <b>S23</b> |
| <b>15. Results of XPS analysis of (PC-SH) Ru NPs before and after the reaction .....</b>                | <b>S23</b> |
| <b>16. Results of X-ray absorption near-edge structure (XANES) analysis .....</b>                       | <b>S24</b> |
| <b>17. Characterization data .....</b>                                                                  | <b>S25</b> |
| <b>18. NMR-Spectra.....</b>                                                                             | <b>S32</b> |
| <b>19. References .....</b>                                                                             | <b>S46</b> |

## 1. General information

$\text{RuCl}_3 \cdot n\text{H}_2\text{O}$  was obtained from TANAKA Kikinzoku Kogyo. Ethanol of guaranteed reagent grade was supplied by FUJIFILM Wako Pure Chemical Corporation. 2-Methacryloyloxyethyl phosphorylcholine (MPC) was purchased from NOF Co., Japan. Unless otherwise specified, all starting materials were commercially available and were employed without further purification. Diisopropylamine was purified by distillation under reduced pressure (0.3 mmHg) before use. Gas chromatography (GC) analyses were carried out using a Shimadzu GC-2025 instrument equipped with a flame-ionization detector (FID) and fitted with a BP-5 capillary column (25 m length, 0.22 mm internal diameter, film thickness 0.25  $\mu\text{m}$ ).  $^1\text{H}$  and  $^{13}\text{C}$  nuclear magnetic resonance (NMR) spectra were recorded on a JEOL JNM-ECZ-400S spectrometer operating at 400 MHz for  $^1\text{H}$  and 100 MHz for  $^{13}\text{C}$  measurements. Spectra were referenced to  $\text{CDCl}_3$  using the residual solvent signals ( $\delta$  7.26 ppm for  $^1\text{H}$  NMR and  $\delta$  77.0 ppm for  $^{13}\text{C}$  NMR). Compounds **3b**,<sup>1</sup> **3d**,<sup>1</sup> **3e**,<sup>1</sup> **3f**,<sup>1</sup> **3i**,<sup>1</sup> **3j**,<sup>1</sup> **3k**,<sup>1</sup> **3l**,<sup>1</sup> and **3n**<sup>2</sup> were previously reported in the literature. The obtained products were analyzed and confirmed using  $^1\text{H}$  NMR,  $^{13}\text{C}$  NMR, and GC-mass spectrometry (GC-MS). In addition, compounds **3a**, **3c**, **3g**, **3h**, **3m** were further characterized by infrared (IR) spectroscopy and high-resolution mass spectrometry (HRMS), along with  $^1\text{H}$  NMR,  $^{13}\text{C}$  NMR, analyses. GC-MS measurements were performed using a Shimadzu GCMS-QP2010 SE system. IR spectroscopy was recorded with a Fourier-transform infrared (FT-IR) spectrometer (Shimadzu IRAffinity-1). HRMS were obtained using a Bruker microTOF mass spectrometer equipped with an electrospray ionization (ESI) source. Product yields were estimated from the GC peak areas using an internal standard method. Ultraviolet-visible (UV-vis) absorption spectra were measured using a JASCO V-670 spectrometer. Photoluminescence emission measurements were conducted with a Shimadzu RF-6000 spectrofluorometer using an excitation wavelength of 350 nm. Dynamic light scattering (DLS) measurements were performed in ethanol at 25 °C with a Zetasizer Nano ZSP instrument (Malvern Panalytical Ltd.). The resulting data were evaluated using the cumulant analysis method. Thermogravimetric (TG) analysis was conducted using a PerkinElmer TGA4000 instrument under a nitrogen atmosphere at a heating rate of 10 °C/min with an Al sample pan. Annular dark-field scanning transmission electron microscopy (ADF-STEM) observations were carried out using a JEOL JEM-ARM200F microscope operated at an accelerating voltage of 200 kV. Small-angle X-ray scattering (SAXS) experiments were conducted at the BL19B2 beamline at SPring-8 (Hyogo, Japan) using an X-ray beam energy of 25 keV. Scattered X-ray profiles were recorded with a PILATUS 2M area detector. For SAXS measurements, the sample-to-detector distance was set to 2040 mm. Calibration of this distance was performed using the diffraction pattern of a standard silver behenate sample. Each SAXS profile was acquired with an exposure time of 60 s. The two-dimensional SAXS patterns were transformed into one-dimensional scattering profiles by circular averaging. The SAXS intensity profiles were plotted as a function of the scattering vector,  $q$ , which is defined as  $q = 4\pi \sin\theta / \lambda$ , where

$\theta$  represents half of the scattering angle and  $\lambda$  corresponds to the wavelength of the X-ray beam. Curve fitting of the SAXS data was carried out using spherical particle models based on previously reported methods.<sup>3,4</sup> X-ray photoelectron spectroscopy (XPS) measurements (Contents 4) were performed with a SHIMADZU KRATOS ULTRA2 system using monochromatic Al K $\alpha$  radiation. The binding energy scale was calibrated with reference to the C 1s peak of adventitious carbon at 284.8 eV. For spectral processing, a Shirley background was subtracted, and peak deconvolution was conducted using a mixed Gaussian-Lorentzian fitting function. XPS measurements (Contents 14) were performed with a ULVAC-PHI PHI5000 VersaProbe system using monochromatic Al K $\alpha$  radiation. The binding energy scale was calibrated with reference to the C 1s peak of adventitious carbon at 284.8 eV. For spectral processing, a Shirley background was subtracted, and peak deconvolution was conducted using a mixed Gaussian-Lorentzian fitting function. X-ray absorption spectroscopy (XAS) measurements were conducted at the BL14B2 beamline at SPring-8. Ru K-edge spectra were collected in transmission mode at ambient temperature. A Si(311) double-crystal monochromator was used to monochromatize the incident beam. Data processing and analysis were carried out using the Athena software (version 0.9.25) included in the Demeter package.<sup>5</sup>

## 2. Experimental procedures

### Synthesis of thiolated 2-methacryloyloxyethyl phosphorylcholine (PC-SH)<sup>6</sup>

MPC (1.47 g, 5 mmol) and 1,6-hexanedithiol (1.50 g, 10 mmol) were dissolved in 10 mL degassed chloroform. Michael-type addition was conducted by adding distilled diisopropylamine (0.028 mL, 0.2 mmol) for 22 h at 25 °C under Ar. The mixture was precipitated into acetone and was vacuumed with an oil pump for 1 h to eliminate the residual acetone (0.3 mmHg). The sample was dissolved in pure water. PC-SH was obtained as a white powder after collection and lyophilization. PC-SH was kept under dry nitrogen until use.

### Synthesis of (PC-SH) Ru NPs

Preparation of 0.1 M ethanol solution of RuCl<sub>3</sub>·*n*H<sub>2</sub>O. A mixture of RuCl<sub>3</sub>·*n*H<sub>2</sub>O (225 mg) and ethanol (10 mL) was added to a vial and allowed to stand at room temperature overnight.

The RuCl<sub>3</sub>·*n*H<sub>2</sub>O solution (0.1 M, 0.05 mmol) and PC-SH (111 mg, 0.25 mmol) were dissolved in 2.5 mL of ethanol. After stirring for 30 min at 25 °C, NaBH<sub>4</sub> (9.45 mg, 0.25 mmol) was added in four parts every 15 min with stirring. After all the NaBH<sub>4</sub> was added, the solution was stirred for 24 h at 25 °C. The mixture was then dialyzed using a dialysis membrane (MWCO: 3500) for 6 h to eliminate any unreacted PC-SH and RuCl<sub>3</sub>·*n*H<sub>2</sub>O. The ethanol was removed from the mixture using an evaporator and oil pump (0.3 mmHg). Finally, the sample was dissolved in pure water (2 mL) and lyophilized. After that, the sample (1 mM) was obtained for adding ethanol (50 mL).

### **Hydrosilylation reaction of 9-decene-1-ol (1a) with methyl diphenylsilane (2a) (Table 1, entry 1)**

A dispersion (1 mM) of the synthesized (PC-SH) Ru NPs (2.0 mL, 0.2 mol%) was introduced into a 20 mL Schlenk flask. The ethanol was subsequently removed by evaporation. Diethylene Glycol Dimethyl Ether (diglyme, 1 mL), **1a** (0.156 g 1.0 mmol), and **2a** (0.793 g, 4.0 mmol) were added to the flask. The reaction mixture was then stirred at 120 °C for 24 h under Ar. Conversion of the substrates and the yield of product **3a** were determined from the GC peak areas using nonane as an internal standard.

### **Preparation of (PC-SH) Ru NPs\_ar**

1-Dodecene (**1e**, 1 mmol) and methyl diphenylsilane (**2a**, 4 mmol) were reacted at 120°C for 24 h in a mixture of diglyme (1 mL) solvent using (PC-SH) Ru NPs (2.0 mL, 0.2 mol%) as the catalyst. After the reaction, the catalyst was separated from the mixture using a membrane filter with a pore size of 1.0 µm and recovered; this was used as (PC-SH) Ru NPs\_ar.

### **Catalyst recycling procedure**

9-decene-1-ol (**1a**, 1 mmol) and methyl diphenylsilane (**2a**, 4 mmol) were reacted at 120°C for 24 h in a mixture of diglyme (1 mL) solvent using (PC-SH) Ru NPs (2.0 mL, 0.2 mol%) as the catalyst. After the reaction, the catalyst was separated from the mixture using a membrane filter with a pore size of 1.0 µm. The catalyst was then dissolved in methanol (1 mL). This solution was placed in a Schlenk flask and the methanol was removed under vacuum. Then, **1a**, **2a** and the solvent were added to the flask for use in the next cycle.

### **Preparation of samples for ADF-STEM**

Ethanol was removed from the (PC-SH) Ru NPs (1 mL, 1 mM) under reduced pressure using a rotary evaporator. The obtained NPs were then redispersed in ethanol (2 mL). The resulting suspension was filtered through a membrane filter (RephiQuik polytetrafluoroethylene (PTFE), 0.22 µm).

### **Preparation of samples for SAXS**

After the lyophilization, (PC-SH) Ru NPs solid was dissolved in ethanol (0.1 mL). The solution of (PC-SH) Ru NPs in ethanol (0.5 M) was transferred to a glass capillary.

### **Preparation of samples for DLS**

An ethanol solution of (PC-SH) Ru NPs (1 mM) was passed through a membrane filter (RephiQuik PTFE, 0.22 µm) and subsequently transferred to a glass cell with dimensions of 12 mm × 12 mm. The catalyst particles were dispersed in filtered ethanol (2 mL), and the resulting suspension (0.25 mM) was placed into the glass cell at 25 °C.

### **Preparation of samples for TG**

Ethanol was removed from the (PC-SH) Ru NPs with an evaporator and oil pump (0.3 mmHg). The solid sample (5 mg) was placed on an Al sample cup.

### **Preparation of samples for XPS (Contents 4)**

The solutions obtained after the reactions of 9-decene-1-ol with methyldiphenylsilane (2:1, 1:1, 2:1, 1:4) were filtered through a membrane filter using hexane. The resulting catalysts after the reaction were dried in a desiccator (100 °C for 2 hours, followed by 16 hours under vacuum). Each sample was placed on an indium foil for analysis.

### **Preparation of samples for XPS (Contents 14)**

Ethanol was removed from the (PC-SH) Ru NPs (50 mL, 1 mM) under reduced pressure using a rotary evaporator. The remaining samples were further dried under reduced pressure in a desiccator equipped with a diaphragm pump at 100 °C for 10 h. Subsequently, additional drying was conducted for 1 h using a turbomolecular pump (Edwards EXT70) at 90 Pa. The resulting sample was mounted onto an Ag plate measuring 5 mm × 5 mm.

### **Preparation of samples for XAS**

For the XAS measurements, powdered samples were diluted with boron nitride to obtain an appropriate concentration for analysis, and pellet samples with a thickness of approximately 1 mm were prepared. For analysis of the (PC-SH) Ru NPs, after lyophilization, (PC-SH) Ru NPs solid was dissolved in ethanol (1.43 mL). The solution of (PC-SH) Ru NPs in ethanol (35 mM) was transferred to a PTFE cell (light path: 40 mm).

### **Preparation of samples for ICP-OES**

For metal quantification samples, 2 ml of 1 mM (PC-SH) Ru NPs were taken, the solvent was removed and the sample dissolved in 2 ml of HNO<sub>3</sub> and 18 ml of distilled water. For the leaching test, the mixture obtained after the reaction was filtered through a PTFE T100A025A ADVANTEC® membrane filter using hexane. The solvent was then evaporated and removed, and the residue dissolved in 2 ml of HNO<sub>3</sub> and 18 ml of distilled water.

### 3. Results of Fluorescence (PL) and UV-visible (UV-Vis) spectroscopic analyses

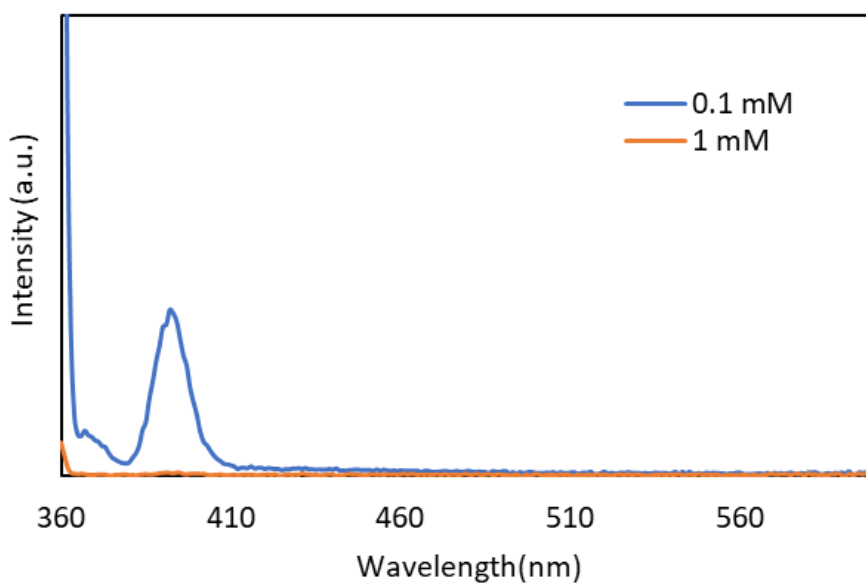

**Figure S1.** Fluorescence spectra of (PC-SH) Ru NPs under irradiation with 350 nm excitation light. The decrease in fluorescence of the 1 mM confirms concentration quenching.

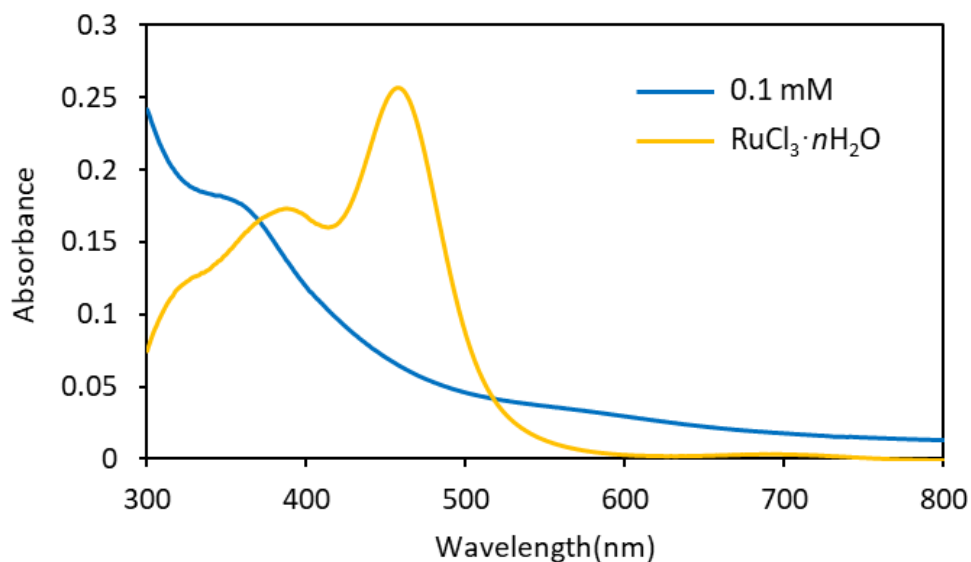

**Figure S2.** UV-visible spectra of (PC-SH) Ru NPs (blue) and precursor (yellow,  $\text{RuCl}_3 \cdot n\text{H}_2\text{O}$ ). The absence of precursor peak at approximately 400 nm indicates that no unreacted precursor remains in the synthesized (PC-SH) Ru NPs.

#### 4. <sup>1</sup>H- and <sup>31</sup>P-NMR measurements of the interaction between -OH and MPC

##### <sup>1</sup>H-NMR

Preparation of sample

Samples of MPC (0.1 mmol), 9-decene-1-ol (0.1 mmol), 3-butene-1-ol (0.1 mmol), MPC (0.05 mmol) + 9-decene-1-ol (0.05 mmol), and MPC (0.05 mmol) + 3-butene-1-ol (0.05 mmol) were prepared in CDCl<sub>3</sub> (0.5 mL) in NMR tubes and mixed using a vortex mixer.

**Table S1.** Chemical shifts of <sup>1</sup>H-NMR spectra

|                     | Chemical shift (ppm) | peak shift (ppm) |
|---------------------|----------------------|------------------|
| 9-decene-1-ol       | 1.37-1.31            | -                |
| MPC + 9-decene-1-ol | 2.38                 | 1.01-1.07        |
| 3-butene-1-ol       | 1.45                 | -                |
| MPC + 3-butene-1-ol | 2.77                 | 1.32             |

9-decene-1-ol

<sup>1</sup>H-NMR (400 MHz, CDCl<sub>3</sub>) δ: 5.86-5.76 (1H, m), 5.02-4.91 (2H, m), 3.64 (2H, t, *J* = 6.6 Hz), 2.05-2.02 (2H, m), 1.60-1.53 (2H, m), 1.37-1.31 (11H, m, overlapping signals).

MPC + 9-decene-1-ol

MPC : <sup>1</sup>H-NMR (400 MHz, CDCl<sub>3</sub>) δ: 6.08-6.08 (1H, m), 5.56-5.54 (1H, m), 4.30-4.25 (4H, m), 4.06-4.03 (2H, m), 3.78-3.77 (2H, m), 3.34 (9H, s), 1.90 (3H, s).

9-decene-1-ol : <sup>1</sup>H-NMR (400 MHz, CDCl<sub>3</sub>) δ: 5.83-5.73 (1H, m), 4.99-4.88 (2H, m), 3.57 (2H, t, *J* = 6.7 Hz), 2.38 (1H, br s), 2.02-1.99 (2H, m), 1.55-1.48 (2H, m), 1.35-1.29 (10H, m).

3-butene-1-ol

<sup>1</sup>H-NMR (400 MHz, CDCl<sub>3</sub>) δ: 5.86-5.75 (1H, m), 5.16-5.13 (2H, m), 3.68 (2H, t, *J* = 6.0 Hz), 2.36-2.31 (2H, m), 1.45 (1H, s).

MPC + 3-butene-1-ol

MPC : <sup>1</sup>H-NMR (400 MHz, CDCl<sub>3</sub>) δ: 6.08-6.08 (1H, m), 5.55-5.55 (1H, m), 4.29-4.26 (4H, m), 4.06-4.03 (2H, m), 3.78-3.75 (2H, m), 3.34 (9H, s), 1.90 (3H, s).

3-butene-1-ol : <sup>1</sup>H-NMR (400 MHz, CDCl<sub>3</sub>) δ: 5.81-5.75 (1H, m), 5.11-5.05 (2H, m), 3.62 (2H, t, *J* = 6.0 Hz), 2.77 (1H, br s), 2.31-2.26 (2H, m).

MPC

$^1\text{H-NMR}$  (400 MHz,  $\text{CDCl}_3$ )  $\delta$ : 6.06-6.03 (1H, m), 5.54-5.51 (1H, m), 4.26-4.23 (4H, m), 4.02-3.99 (2H, m), 3.77-3.75 (2H, m), 3.33 (9H, s), 1.87 (3H, s).

### $^{31}\text{P-NMR}$

Preparation of sample

MPC (0.01 mmol), either with or without 9-decene-1-ol (0.01 mmol) or 3-butene-1-ol (0.01 mmol), was dissolved in 0.5 mL of  $\text{CDCl}_3$  in an NMR tube and mixed using a vortex mixer. The peak of triphenyl phosphate was used as the internal standard (-17.0 ppm).

**Table S2.** Chemical shifts of  $^{31}\text{P-NMR}$  spectra

|                     | Chemical shift (ppm) | peak shift (ppm) |
|---------------------|----------------------|------------------|
| MPC                 | 0.09                 | -                |
| MPC + 9-decene-1-ol | -0.04                | -0.13            |
| MPC + 3-butene-1-ol | -0.30                | -0.39            |

# <sup>1</sup>H-NMR

9-decene-1-ol

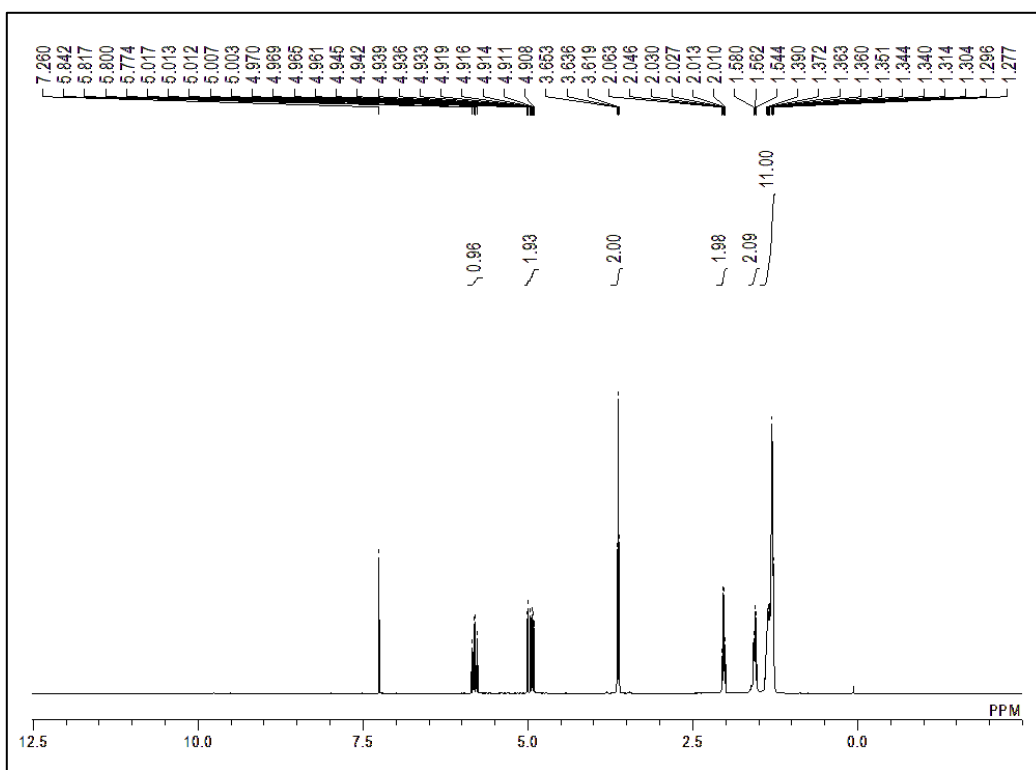

MPC + 9-decene-1-ol

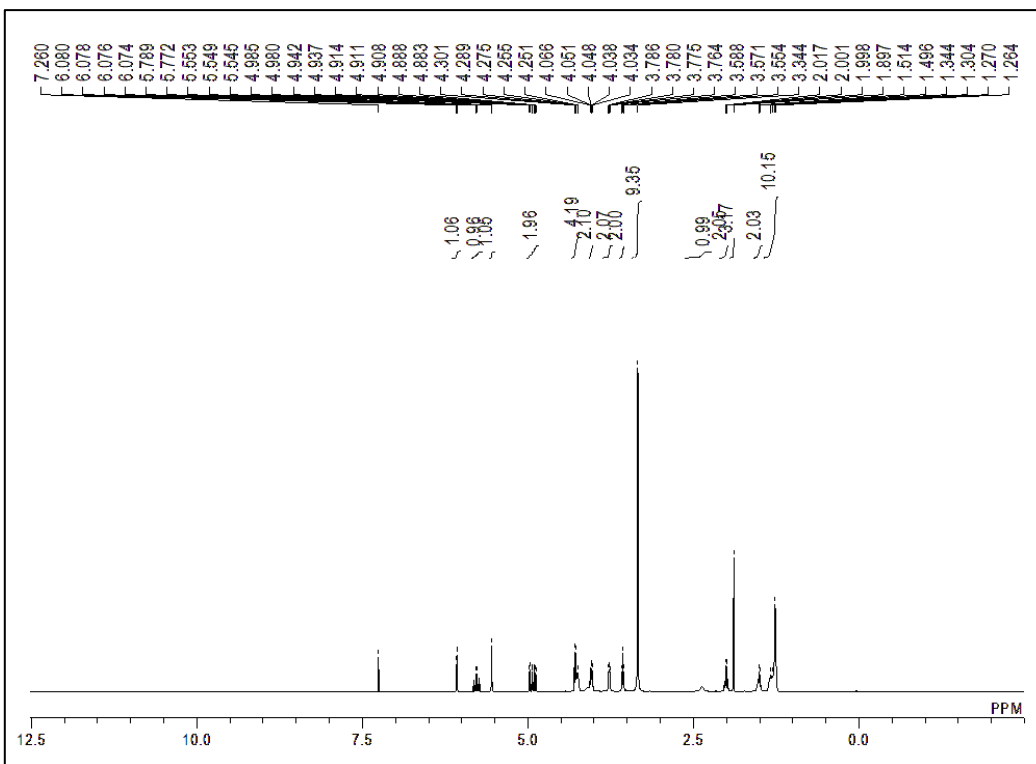



MPC

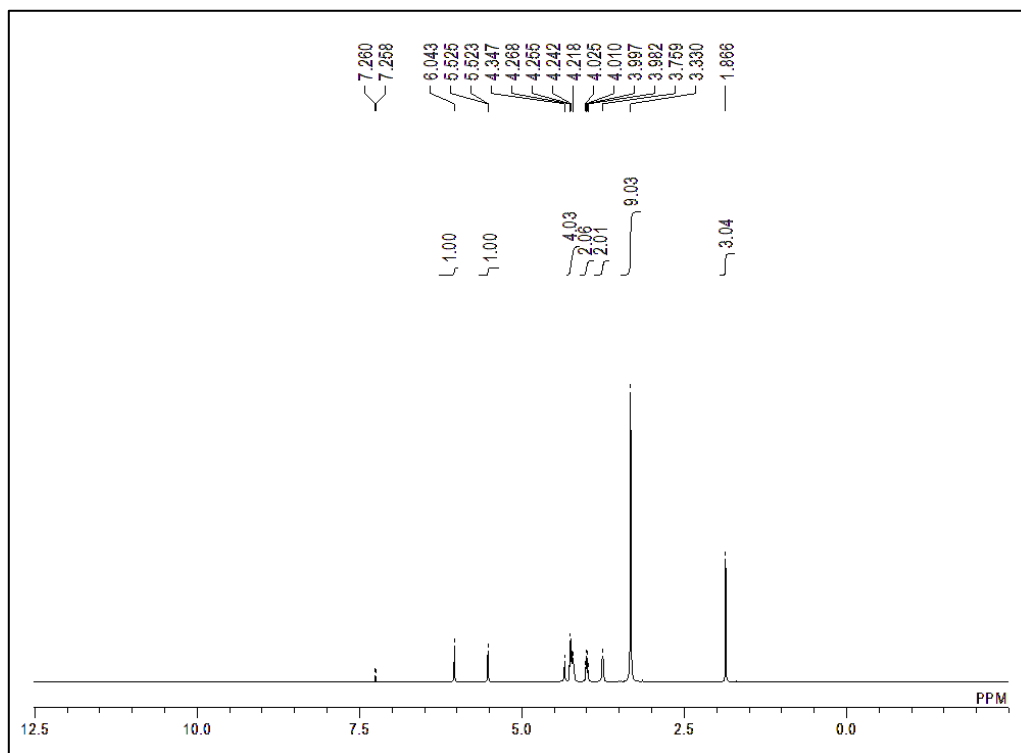

<sup>31</sup>P-NMR

MPC

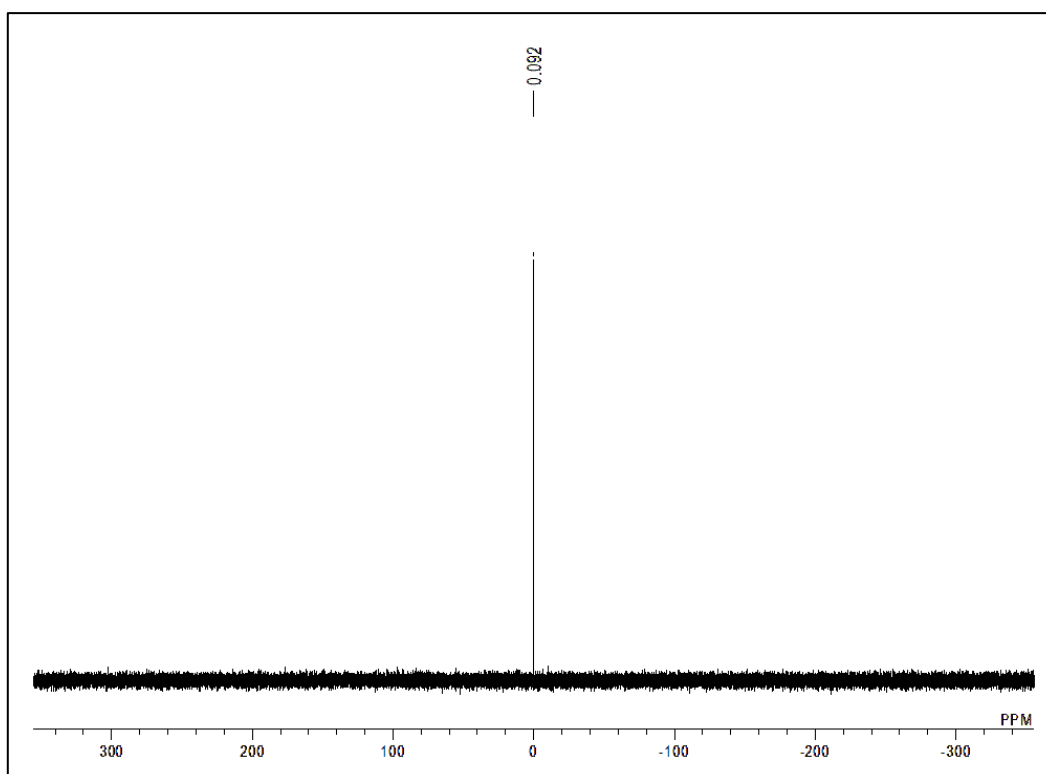

MPC + 9-decene-1-ol

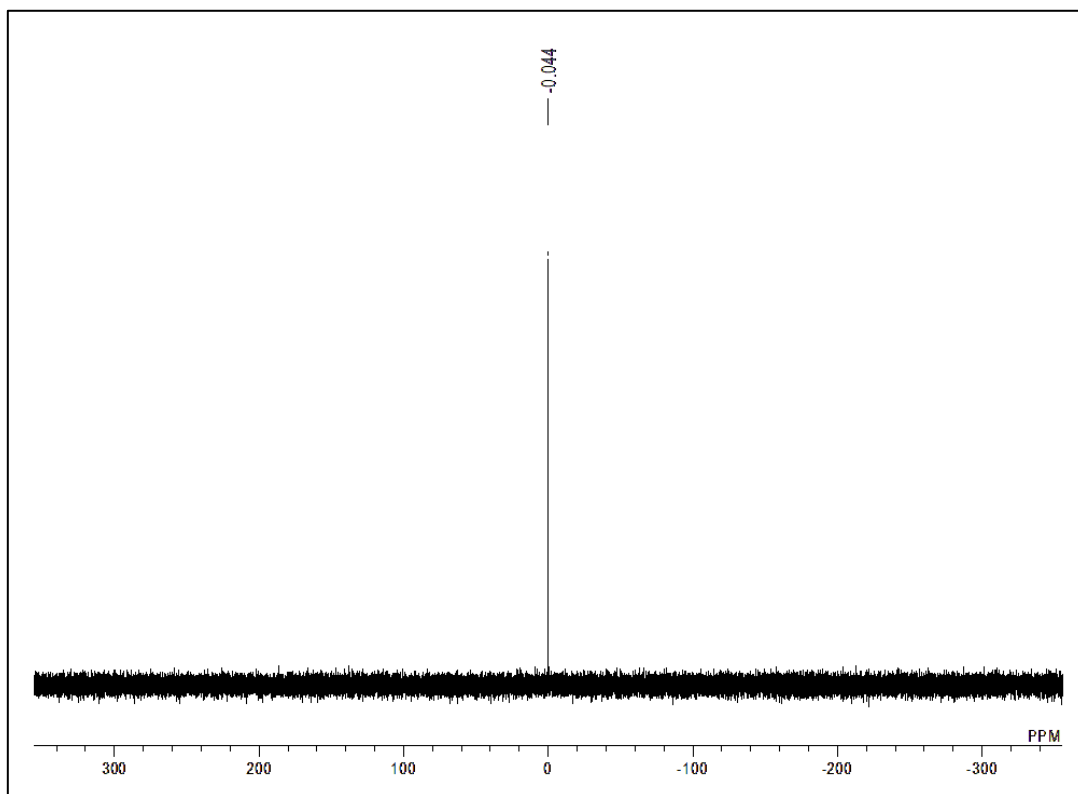

MPC + 3-butene-1-ol

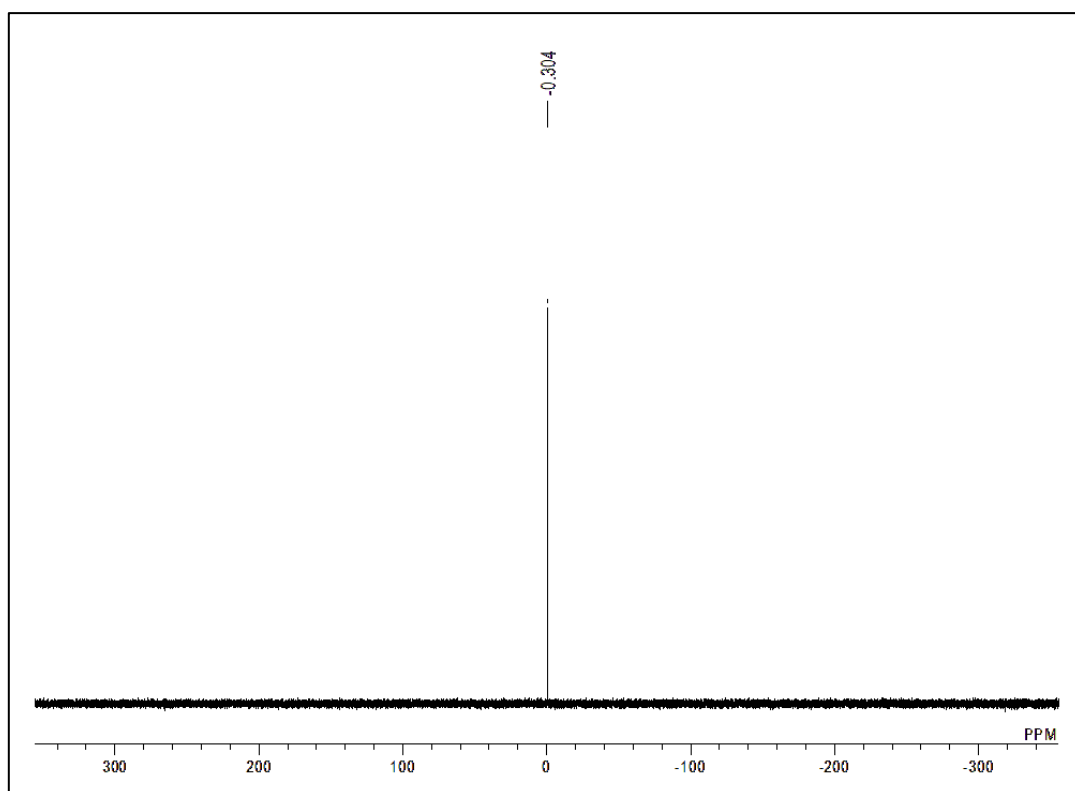

## 5. A study of MPC as an additive

**Table S3.** A study of MPC as an additive with Ru-catalysts as a catalysed hydrosilylation of 9-decen-1-ol (**1a**) with methyldiphenylsilane (**2a**)<sup>a</sup>

| $\text{HO}-(\text{CH}_2)_8-\text{CH}=\text{CH}_2 + \text{HSiPh}_2\text{Me} \xrightarrow[\text{dyglyme (1 mL), 120}^\circ\text{C, 24 h}]{\text{Catalyst (0.2 mol\%)} \atop \text{MPC(additive) 1 mmol}}$ |                                      |            |           |           |           |
|---------------------------------------------------------------------------------------------------------------------------------------------------------------------------------------------------------|--------------------------------------|------------|-----------|-----------|-----------|
| <b>1a</b>                                                                                                                                                                                               | <b>2a</b>                            |            | <b>3a</b> | <b>4a</b> |           |
| Entry                                                                                                                                                                                                   | Catalyst                             | Additive   | Conv. (%) |           |           |
|                                                                                                                                                                                                         |                                      |            | <b>1a</b> | <b>3a</b> | <b>4a</b> |
| 1                                                                                                                                                                                                       | DMF-Ru NPs                           | MPC 1 mmol | >99       | trace     | 6         |
| 2                                                                                                                                                                                                       |                                      | w/o MPC    | >99       | nd        | 22        |
| 3                                                                                                                                                                                                       | RuCl <sub>3</sub> ·nH <sub>2</sub> O | MPC 1 mmol | 78        | 19        | 6         |
| 4                                                                                                                                                                                                       |                                      | w/o MPC    | >99       | nd        | 34        |

<sup>a</sup>Reaction conditions: **1a** (1 mmol), **2a** (4 mmol), DMF-Ru NPs (0.2 mol%) dissolved in diglyme (1 mL) were stirred at 120 °C for 24 h under Ar. <sup>b</sup>Yields were determined by GC based on **1a** used (nonane as internal standard).

**6. X-ray photoelectron spectroscopy (XPS) measurements of (PC-SH)Ru NPs after reaction with varying alkene (1a)-to-silane (2a) ratios**

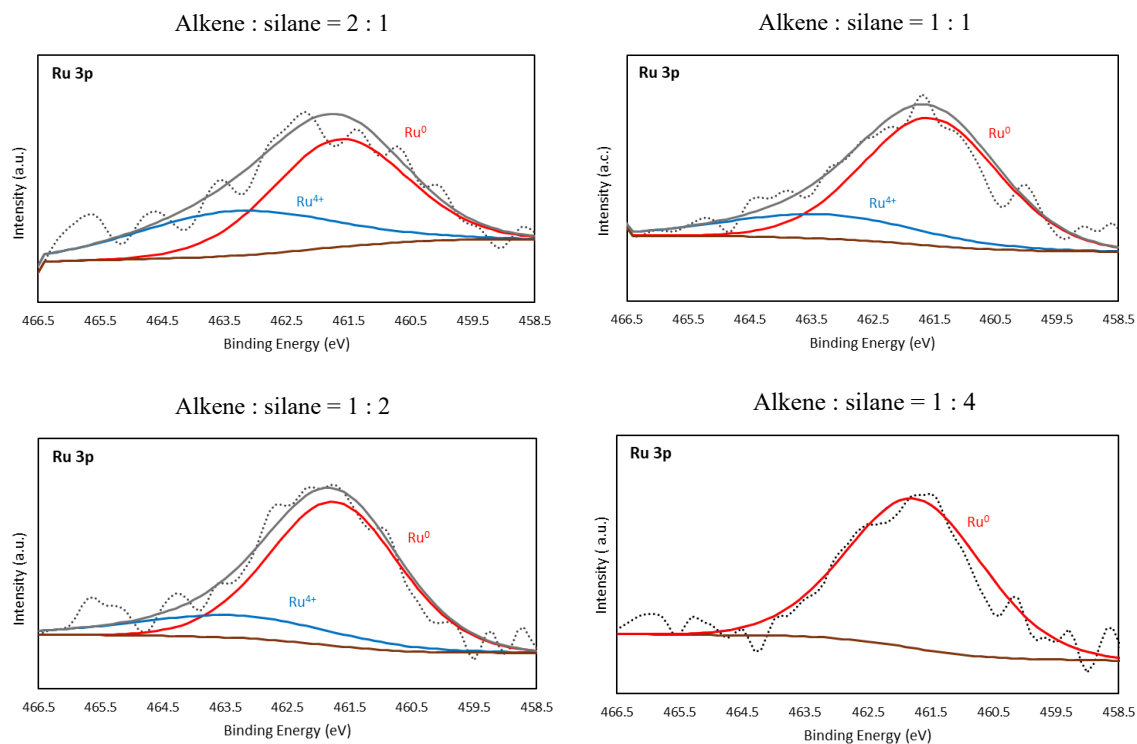

**Figure S3.** XPS profiles for the Ru 3p region for (PC-SH) Ru NPs after reaction with varying alkene (1a)-to-silane (2a) ratios

**Table S4.** XPS peak positions and full-width at half-maximum (FWHM) values (Ru 3p<sub>3/2</sub>)

| Sample<br>(Alkene : Silane) |                                      | Binding Energy (eV) | FWHM | Ratio (%) |
|-----------------------------|--------------------------------------|---------------------|------|-----------|
| 2:1                         | Ru <sup>0</sup>                      | 461.6               | 2.6  | 62.45     |
|                             | Ru <sup>4+</sup> (RuO <sub>2</sub> ) | 463.3               | 3.7  | 37.55     |
| 1:1                         | Ru <sup>0</sup>                      | 461.6               | 2.6  | 78.70     |
|                             | Ru <sup>4+</sup> (RuO <sub>2</sub> ) | 463.3               | 3.9  | 21.30     |
| 1:2                         | Ru <sup>0</sup>                      | 461.7               | 2.5  | 80.73     |
|                             | Ru <sup>4+</sup> (RuO <sub>2</sub> ) | 463.3               | 3.9  | 19.27     |
| 1:4                         | Ru <sup>0</sup>                      | 461.7               | 2.6  | 100       |
|                             | Ru <sup>4+</sup> (RuO <sub>2</sub> ) | -                   | -    | -         |

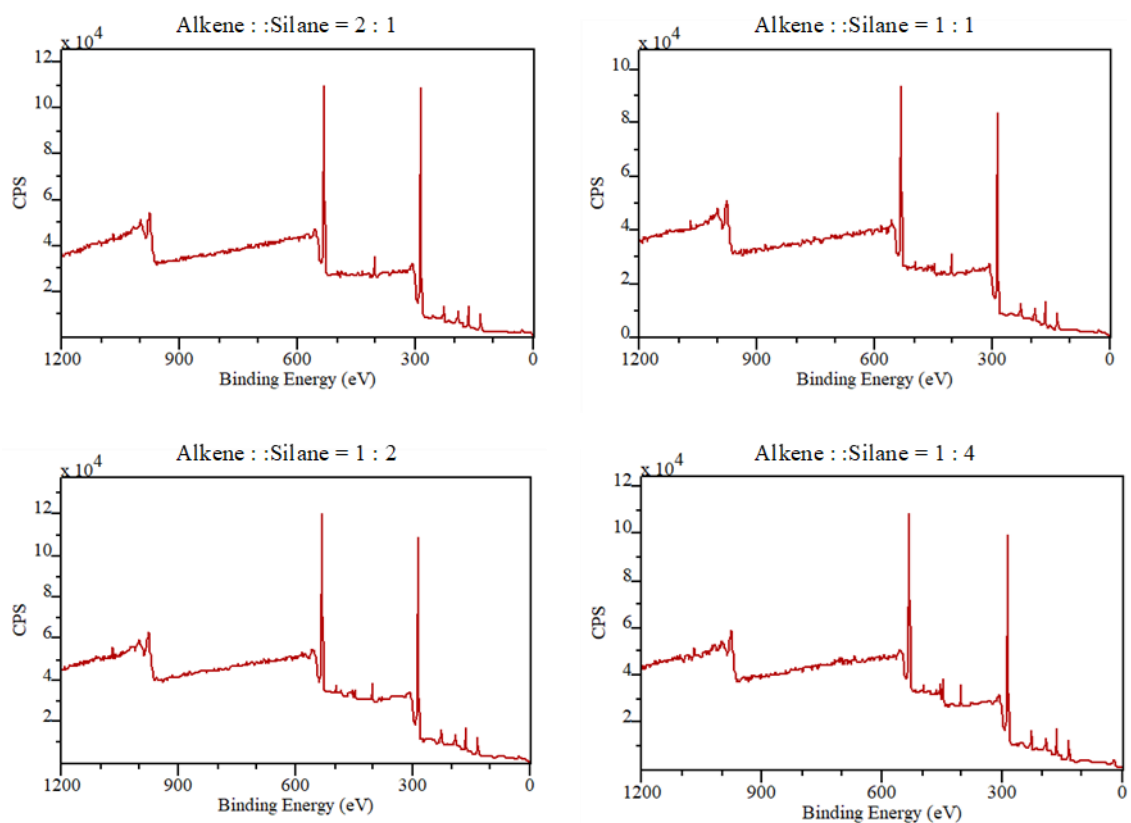

**Figure S4.** Survey scan XPS spectrum of (PC-SH) Ru NPs with varying alkene (**1a**)-to-silane (**2a**) ratios.

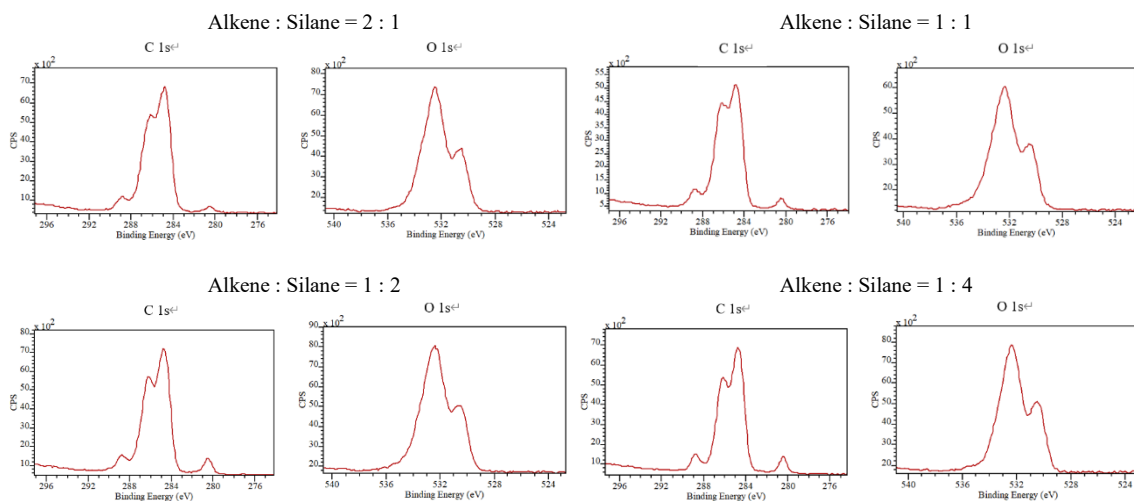

**Figure S5.** Narrow scan XPS spectrum of (PC-SH) Ru NPs with varying alkene (**1a**)-to-silane (**2a**) ratios.





**Table S9.** Study of H<sub>2</sub>PtCl<sub>6</sub>-catalysed hydrosilylation of 9-decene-1-ol (**1a**) with methyldiphenylsilane (**2a**)<sup>a</sup>

|                                                                                    |                                  |                        |           |                        |           |
|------------------------------------------------------------------------------------|----------------------------------|------------------------|-----------|------------------------|-----------|
| 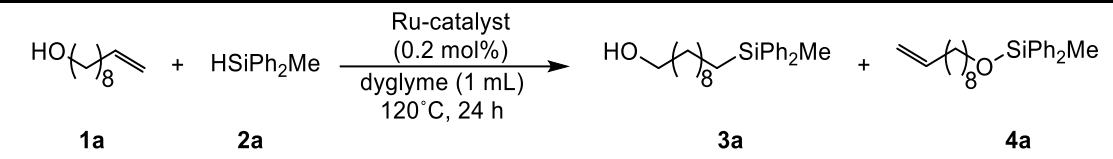 |                                  |                        |           |                        |           |
| <b>1a</b>                                                                          | <b>2a</b>                        |                        | <b>3a</b> |                        | <b>4a</b> |
| Entry                                                                              | Ru-Catalyst                      | Conv. <sup>b</sup> (%) |           | Yield <sup>b</sup> (%) |           |
|                                                                                    |                                  | <b>1a</b>              | <b>2a</b> | <b>3a</b>              | <b>4a</b> |
| 1                                                                                  | (PC-SH) Ru NPs                   | >99                    | 96        | 51 [39] <sup>c</sup>   | nd        |
| 2                                                                                  | H <sub>2</sub> PtCl <sub>6</sub> | >99                    | 40        | nd                     | 5         |

<sup>a</sup>Reaction conditions: **1a** (1 mmol), **2a** (4 mmol), Ru-catalyst (0.2 mol%) dissolved in diglyme (1 mL) were stirred at 120 °C for 24 h under Ar. <sup>b</sup>Yields were determined by GC based on **1a** used (nonane as internal standard). <sup>c</sup>Number in square brackets show the isolated yield.

(PC-SH) Ru NPs were compared with H<sub>2</sub>PtCl<sub>6</sub>, an industrial standard. The results showed that the turnover number (TON) was higher for (PC-SH) Ru NPs when 1-dodecene was used (Table S8). Furthermore, when ω-hydroxyalkenes were used, H<sub>2</sub>PtCl<sub>6</sub> did not produce **3a** and only a small amount of **4a** was formed (Table S9).

### 8. Unsuccessful substrates

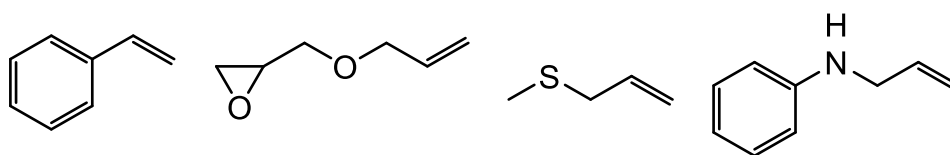**Figure S6.** Unsuccessful substrates of (PC-SH) Ru NPs-catalyzed hydrosilylation

## 9. Results of Small-Angle X-ray Scattering (SAXS) analysis

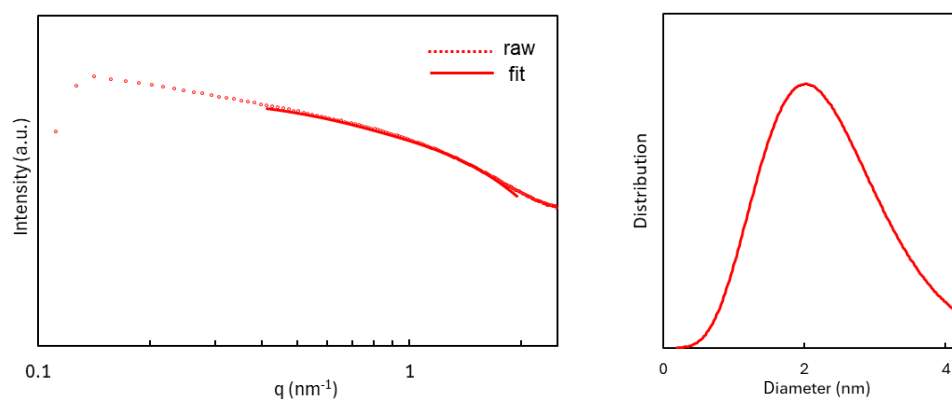

**Figure S7.** SAXS profiles and particle distributions of the (PC-SH) Ru NPs

**Table S10.** Fitting results for the SAXS profiles

| Sample         |       | Radius <sup>a</sup> (nm) | sigma | $\eta^b$  | R <sup>2</sup> | Ratio <sup>c</sup> |
|----------------|-------|--------------------------|-------|-----------|----------------|--------------------|
| (PC-SH) Ru NPs | fit 1 | 1.17                     | 0.201 | 0 (fixed) | 0.9996         | 97 : 3             |
|                | fit 2 | 1.99                     | 0.807 | 0 (fixed) |                |                    |

<sup>a</sup>average particle radius, <sup>b</sup>volume fraction, <sup>c</sup>ratio of (fit 1 : fit 2) estimated from their relative intensity.



## 12. Results of Fourier Transform Infrared Spectroscopy (FT-IR) analyses

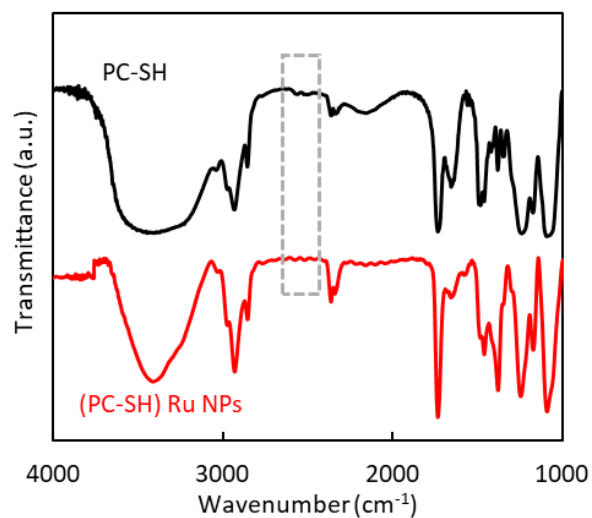

**Figure S10.** FT-IR spectra of PC-SH (black) and (PC-SH) Ru NPs (red).

## 13. Results of Thermogravimetric (TG) analysis

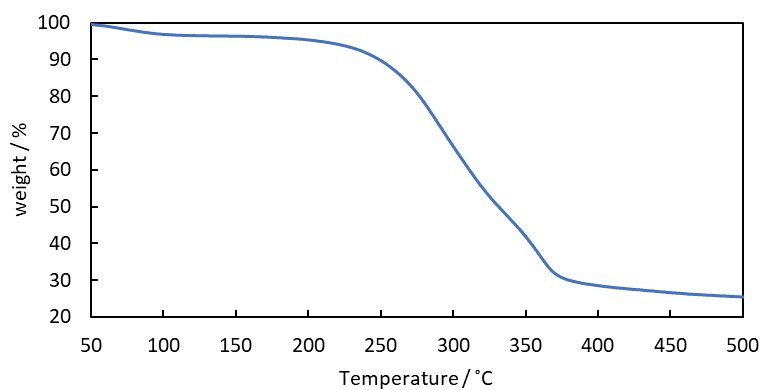

**Figure. S11.** Thermogravimetric analysis of (PC-SH) Ru NPs  
Td<sub>5</sub>: 210 °C.

#### 14. Results of Inductively Coupled Plasma Optical Emission Spectrometry (ICP-OES) analysis

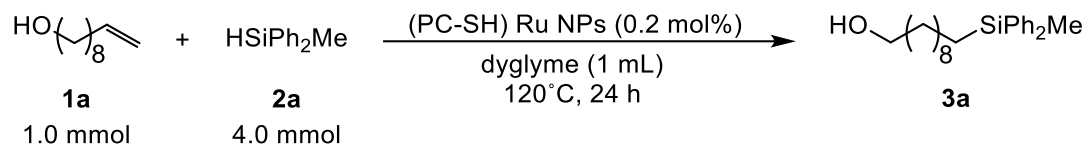

**Table S11.** Quantification of the Ru content in (PC-SH) Ru NPs and the amount eluted after the reaction.

|                             | SD                   | DL                   | ppm                  |
|-----------------------------|----------------------|----------------------|----------------------|
| (PC-SH) Ru NPs              | $4.2 \times 10^{-2}$ | $5.4 \times 10^{-1}$ | 2.9                  |
| filtrate after the reaction | $3.4 \times 10^{-3}$ | $4.4 \times 10^{-2}$ | $8.9 \times 10^{-3}$ |

#### 15. Results of XPS analysis of (PC-SH) Ru NPs before and after the reaction

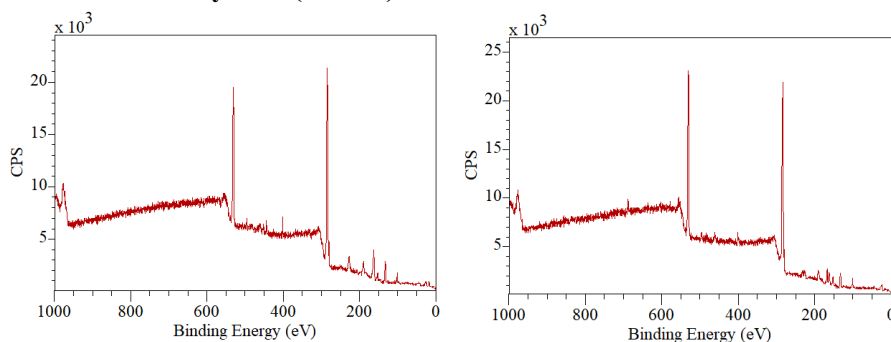

**Figure S12.** Survey scan XPS spectrum of (PC-SH) Ru NPs before(left) and after(right) reaction.

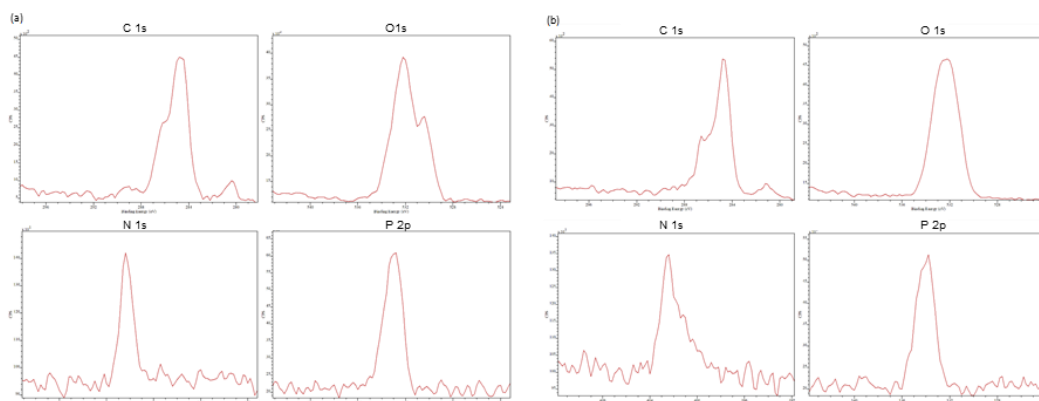

**Figure S13.** Narrow scan XPS spectrum of (PC-SH) Ru NPs before(left) and after(right) reaction.

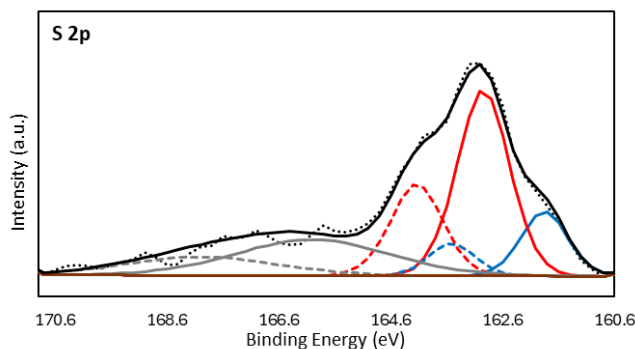

**Figure S14.** XPS profiles for the S 2p region for (PC-SH) Ru NPs\_br

**Table S12.** XPS peak positions and full-width at half-maximum (FWHM) values (Ru  $3p_{3/2}$ )

| Sample                            |                                      | Binding Energy (eV) | FWHM | Ratio (%) |
|-----------------------------------|--------------------------------------|---------------------|------|-----------|
| (PC-SH) Ru NPs<br>Before reaction | Ru <sup>0</sup>                      | 462.0               | 2.7  | 82.7      |
|                                   | Ru <sup>4+</sup> (RuO <sub>2</sub> ) | 463.3               | 3.8  | 17.3      |
| (PC-SH) Ru NPs<br>After reaction  | Ru <sup>0</sup>                      | 462.0               | 2.7  | 65.6      |
|                                   | Ru <sup>4+</sup> (RuO <sub>2</sub> ) | 463.3               | 3.8  | 34.4      |

Surface analysis of the (PC-SH) Ru NPs using XPS at Ru 3p region before and after the reaction revealed the presence of peaks originating from the zero-valent state (462.0 eV) and the tetravalent oxide state (RuO<sub>2</sub>, 463.3 eV) on the ruthenium surface in both cases.

## 16. Results of X-ray absorption near-edge structure (XANES) analysis

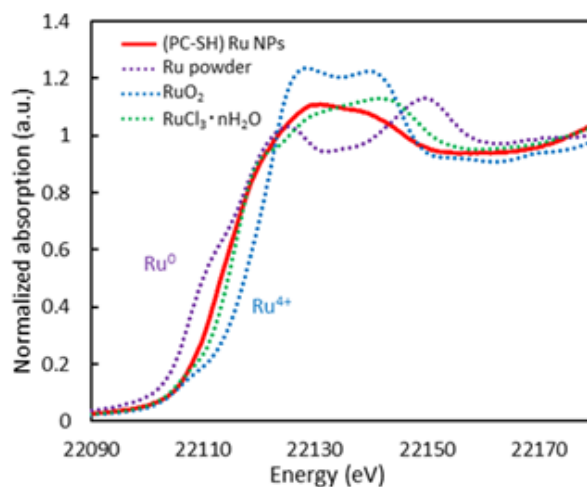

**Figure S15.** Ru K-edge XANES spectra of the reference Ru compounds and (PC-SH) Ru NPs

## 17. Characterization data

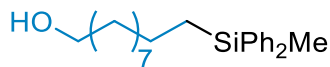

**3a** : The desired product was purified by Kugelrohr distillation (155 °C, 0.3 mmHg, 1 h), followed by column chromatography on silica gel using hexane/ethyl acetate (7:3) as the eluent, and further purified by Kugelrohr distillation (180 °C, 0.3 mmHg, 1 h). The desired product was obtained as a colorless oil in 39% yield (138 mg).

<sup>1</sup>H-NMR (400 MHz, CDCl<sub>3</sub>) δ: 7.54-7.53 (m, 4H), 7.37-7.35 (m, 6H), 3.64 (t, 2H, *J* = 6.6 Hz), 1.60-1.54 (m, 2H), 1.32-1.28 (m, 15H, overlapping signals), 1.09-1.06 (m, 2H), 0.56 (s, 3H); <sup>13</sup>C-NMR (100 MHz, CDCl<sub>3</sub>) δ: 137.51 (C), 134.42 (CH), 129.00 (CH), 127.73 (CH), 63.04 (CH<sub>2</sub>), 33.60 (CH<sub>2</sub>), 32.76 (CH<sub>2</sub>), 29.56 (CH<sub>2</sub>), 29.45 (CH<sub>2</sub>), 29.37 (CH<sub>2</sub>), 29.16 (CH<sub>2</sub>), 25.67 (CH<sub>2</sub>), 23.76 (CH<sub>2</sub>), 14.12 (CH<sub>2</sub>), -4.48 (CH<sub>3</sub>); IR (neat, cm<sup>-1</sup>) 731, 1112, 1426, 2853, 2924, 3068, 3362; HRMS (APCI) *m/z* Calcd for C<sub>23</sub>H<sub>34</sub>OSi [M+H]<sup>+</sup> 393.2011, found 393.1997.

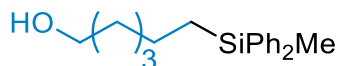

**3b** : The desired product was purified by Kugelrohr distillation (155 °C, 0.3 mmHg, 1 h), followed by column chromatography on silica gel using hexane/ethyl acetate (2:1) as the eluent. The desired product was obtained as a colorless oil in 45% yield (134 mg).

<sup>1</sup>H-NMR (400 MHz, CDCl<sub>3</sub>) δ: 7.53-7.53 (m, 4H), 7.39-7.35 (m, 6H), 3.61 (t, 2H, *J* = 6.6 Hz), 1.54-1.52 (m, 2H), 1.39-1.36 (m, 6H), 1.34 (br, 1H), 1.10-1.08 (m, 2H), 0.55 (s, 3H); <sup>13</sup>C-NMR (100 MHz, CDCl<sub>3</sub>) δ: 137.38 (C), 134.40 (CH), 129.03 (CH), 127.74 (CH), 62.97 (CH<sub>2</sub>), 33.29 (CH<sub>2</sub>), 32.62 (CH<sub>2</sub>), 25.25 (CH<sub>2</sub>), 23.72 (CH<sub>2</sub>), 14.06 (CH<sub>2</sub>), -4.50 (CH<sub>3</sub>); GC-MS (EI) *m/z* (relative intensity) 283(5) [M-CH<sub>3</sub>]<sup>+</sup>, 197(100), 199(62), 142(17), 221(16), 205(15).

The spectroscopic data correspond to those reported in the literature.<sup>1</sup>

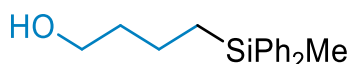

**3c** : The desired product was purified by Kugelrohr distillation (140 °C, 0.3 mmHg, 1 h), followed by column chromatography on silica gel using hexane/ethyl acetate (17:3) as the eluent. The desired product was obtained as a colorless oil in 23% yield (62 mg).

<sup>1</sup>H-NMR (400 MHz, CDCl<sub>3</sub>) δ: 7.54-7.52 (m, 4H), 7.38-7.37 (m, 6H), 3.62 (t, 2H, *J* = 6.4 Hz), 1.64-1.60 (m, 2H), 1.50-1.48 (m, 2H), 1.28 (br, 1H), 1.11-1.06 (m, 2H), 0.57 (s, 3H); <sup>13</sup>C-NMR (100 MHz, CDCl<sub>3</sub>) δ: 137.16 (C), 134.40 (CH), 129.11 (CH), 127.79 (CH), 62.52 (CH<sub>2</sub>), 36.51 (CH<sub>2</sub>), 20.05 (CH<sub>2</sub>), 14.00 (CH<sub>2</sub>), -4.52 (CH<sub>3</sub>); IR (neat, cm<sup>-1</sup>) 673, 733, 1111, 1427, 2868, 2929, 3048, 3356; HRMS (APCI) *m/z* Calcd for C<sub>17</sub>H<sub>22</sub>OSi [M+H]<sup>+</sup> 293.1332, found 293.1339.

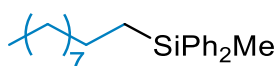

**3d** : The desired product was purified by Kugelrohr distillation (140 °C, 0.3 mmHg, 1 h), followed by column chromatography on silica gel using hexane as the eluent. The desired product was obtained as a colorless oil in 78% yield (264 mg).

<sup>1</sup>H-NMR (400 MHz, CDCl<sub>3</sub>) δ: 7.56-7.51 (m, 4H), 7.38-7.35 (m, 6H), 1.42-1.26 (m, 16H), 1.11-1.07 (m, 2H), 0.90 (t, 3H, *J* = 6.9 Hz), 0.56 (s, 3H, s); <sup>13</sup>C-NMR (100 MHz, CDCl<sub>3</sub>) δ: 137.56 (C), 134.44 (CH), 129.01 (CH), 127.74 (CH), 33.64 (CH<sub>2</sub>), 31.90 (CH<sub>2</sub>), 29.63 (CH<sub>2</sub>), 29.57 (CH<sub>2</sub>), 29.32 (CH<sub>2</sub>), 29.22 (CH<sub>2</sub>), 23.79 (CH<sub>2</sub>), 22.67 (CH<sub>2</sub>), 14.15 (CH<sub>2</sub>), 14.11 (CH<sub>3</sub>), -4.46 (CH<sub>3</sub>); GC-MS (EI) *m/z* (relative intensity) 323(1) [M-CH<sub>3</sub>]<sup>+</sup>, 197(100), 198(19), 260(12), 182(10), 105(5).

The spectroscopic data correspond to those reported in the literature.<sup>1</sup>

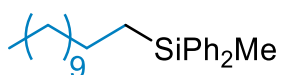

**3e** : The desired product was purified by Kugelrohr distillation (155 °C, 0.3 mmHg, 1 h), followed by column chromatography on silica gel using hexane/ethyl acetate (9:1) as the eluent. The desired product was obtained as a colorless oil in 72% yield (264 mg).

$^1\text{H-NMR}$  (400 MHz,  $\text{CDCl}_3$ )  $\delta$ : 7.56-7.52 (m, 4H), 7.41-7.34 (m, 6H), 1.38-1.31 (m, 20H), 1.09 (t, 2H,  $J = 8.0$  Hz), 0.91 (t, 3H,  $J = 6.9$  Hz), 0.57 (s, 3H);  $^{13}\text{C-NMR}$  (100 MHz,  $\text{CDCl}_3$ )  $\delta$ : 137.57 (C), 134.45 (CH), 129.01 (CH), 127.75 (CH), 33.64 ( $\text{CH}_2$ ), 31.92 ( $\text{CH}_2$ ), 29.67 (2 $\text{CH}_2$ ), 29.64 ( $\text{CH}_2$ ), 29.57 ( $\text{CH}_2$ ), 29.35 ( $\text{CH}_2$ ), 29.22 ( $\text{CH}_2$ ), 23.79 ( $\text{CH}_2$ ), 22.69 ( $\text{CH}_2$ ), 14.16 ( $\text{CH}_2$ ), 14.11 ( $\text{CH}_3$ ), -4.45 ( $\text{CH}_3$ ); GC-MS (EI)  $m/z$  (relative intensity) 351(1) [ $\text{M-CH}_3$ ] $^+$  197(100), 198(19), 183(8), 288(6), 105(5).

The spectroscopic data correspond to those reported in the literature.<sup>1</sup>

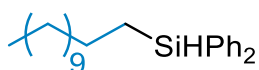

**3f** : The desired product was purified by Kugelrohr distillation (155 °C, 0.3 mmHg, 1 h), followed by column chromatography on silica gel using hexane as the eluent. The desired product was obtained as a colorless oil in 58% yield (205 mg).

$^1\text{H-NMR}$  (400 MHz,  $\text{CDCl}_3$ )  $\delta$ : 7.58-7.57 (m, 4H), 7.41-7.35 (m, 6H), 4.87 (t, 1H,  $J = 3.7$  Hz), 1.50-1.14 (m, 22H), 0.90 (t, 3H,  $J = 6.9$  Hz);  $^{13}\text{C-NMR}$  (100 MHz,  $\text{CDCl}_3$ )  $\delta$ : 135.12 (CH), 134.73 (C), 129.43 (CH), 127.92 (CH), 33.17 ( $\text{CH}_2$ ), 31.92 ( $\text{CH}_2$ ), 29.66 (2 $\text{CH}_2$ ), 29.53 ( $\text{CH}_2$ ), 29.35 ( $\text{CH}_2$ ), 29.21 ( $\text{CH}_2$ ), 24.39 ( $\text{CH}_2$ ), 22.69 ( $\text{CH}_2$ ), 14.11 ( $\text{CH}_3$ ), 12.14 ( $\text{CH}_2$ ); GC-MS (EI)  $m/z$  (relative intensity) 351(0.2) [ $\text{M-H}$ ] $^+$  183(100), 175(36), 196(25), 105(25), 180(18).

The spectroscopic data correspond to those reported in the literature.<sup>1</sup>



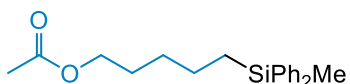

**3i** : The desired product was purified by Kugelrohr distillation (155 °C, 0.3 mmHg, 1 h), followed by column chromatography on silica gel using hexane as the eluent. The desired product was obtained as a colorless oil in 69% yield (225 mg).

$^1\text{H-NMR}$  (400 MHz,  $\text{CDCl}_3$ )  $\delta$ : 7.54-7.53 (m, 4H), 7.40-7.36 (m, 6H), 4.04 (t, 2H,  $J = 6.8$  Hz), 2.05 (s, 3H), 1.64-1.61 (m, 2H), 1.44-1.42 (m, 4H), 1.12-1.10 (m, 2H), 0.58 (s, 3H);  $^{13}\text{C-NMR}$  (100 MHz,  $\text{CDCl}_3$ )  $\delta$ : 171.15 (C), 137.21 (C), 134.39 (CH), 129.08 (CH), 127.77 (CH), 64.54 ( $\text{CH}_2$ ), 29.79 ( $\text{CH}_2$ ), 28.17 ( $\text{CH}_2$ ), 23.51 ( $\text{CH}_2$ ), 20.96 ( $\text{CH}_3$ ), 14.12 ( $\text{CH}_2$ ), -4.51 ( $\text{CH}_3$ ); GC-MS (EI)  $m/z$  (relative intensity) 311 (3)  $[\text{M-CH}_3]^+$ , 197 (100), 249 (42), 179 (42), 241 (23), 198 (19).

The spectroscopic data correspond to those reported in the literature.<sup>1</sup>

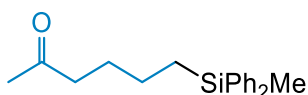

**3j** : The desired product was purified by Kugelrohr distillation (155 °C, 0.3 mmHg, 1 h), followed by column chromatography on silica gel using hexane/ethyl acetate (20:1) as the eluent. The desired product was obtained as a colorless oil in 43% yield (127 mg).

$^1\text{H-NMR}$  (400 MHz,  $\text{CDCl}_3$ )  $\delta$ : 7.53-7.51 (m, 4H), 7.38-7.36 (m, 6H), 2.41 (t, 2H,  $J = 7.5$  Hz), 2.11 (s, 3H), 1.65-1.61 (m, 2H), 1.41-1.39 (m, 2H), 1.09 (t, 2H,  $J = 7.6$  Hz), 0.56 (s, 3H);  $^{13}\text{C-NMR}$  (100 MHz,  $\text{CDCl}_3$ )  $\delta$ : 209.11 (C), 137.09 (C), 134.37 (CH), 129.11 (CH), 127.78 (CH), 43.37 ( $\text{CH}_2$ ), 29.79 ( $\text{CH}_3$ ), 27.60 ( $\text{CH}_2$ ), 23.47 ( $\text{CH}_2$ ), 14.05 ( $\text{CH}_2$ ), -4.54 ( $\text{CH}_3$ ); GC-MS (EI)  $m/z$  (relative intensity) 281 (2)  $[\text{M-CH}_3]^+$ , 197 (100), 219 (60), 137 (31), 199 (26), 105 (13).

The spectroscopic data correspond to those reported in the literature.<sup>1</sup>

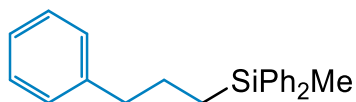

**3k** : The desired product was purified by Kugelrohr distillation (155 °C, 0.3 mmHg, 1 h), followed by column chromatography on silica gel using hexane/ethyl acetate (9:1) as the eluent. The desired product was obtained as a colorless oil in 37% yield (117 mg).

<sup>1</sup>H-NMR (400 MHz, CDCl<sub>3</sub>) δ: 7.54-7.52 (m, 4H), 7.43-7.35 (m, 6H), 7.32-7.28 (m, 2H), 7.23-7.15 (m, 3H), 2.68 (t, 2H, J = 7.5 Hz), 1.79-1.72 (m, 2H), 1.18-1.13 (m, 2H), 0.58 (s, 3H); <sup>13</sup>C-NMR (100 MHz, CDCl<sub>3</sub>) δ: 142.30 (C), 137.18 (C), 134.43 (CH), 129.09 (CH), 128.50 (CH), 128.20 (CH), 127.78 (CH), 125.66 (CH), 39.70 (CH<sub>2</sub>), 25.79 (CH<sub>2</sub>), 13.89 (CH<sub>2</sub>), -4.46 (CH<sub>3</sub>); GC-MS (EI) *m/z* (relative intensity) 301 (2) [M-CH<sub>3</sub>]<sup>+</sup>, 197 (100), 238 (47), 209 (19), 104 (11), 239 (11).

The spectroscopic data correspond to those reported in the literature.<sup>1</sup>

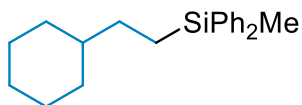

**3l** : The desired product was purified by Kugelrohr distillation (140 °C, 0.3 mmHg, 1 h), followed by column chromatography on silica gel using hexane/ethyl acetate (17:3) as the eluent. The desired product was obtained as a colorless oil in 26% yield (80 mg).

<sup>1</sup>H-NMR (400 MHz, CDCl<sub>3</sub>) δ: 7.54-7.53 (m, 4H), 7.38-7.37 (m, 6H), 1.71-1.61 (m, 5H), 1.30-1.07 (m, 8H), 0.88-0.86 (m, 2H), 0.55 (s, 3H); <sup>13</sup>C-NMR (100 MHz, CDCl<sub>3</sub>) δ: 137.53 (C), 134.43 (CH), 129.00 (CH), 127.74 (CH), 40.72 (CH), 32.92 (CH<sub>2</sub>), 31.18 (CH<sub>2</sub>), 26.75 (CH<sub>2</sub>), 26.41 (CH<sub>2</sub>), 11.05 (CH<sub>2</sub>), -4.57 (CH<sub>3</sub>); GC-MS (EI) *m/z* (relative intensity) 293 (1) [M-CH<sub>3</sub>]<sup>+</sup>, 197 (100), 230 (29), 198 (19), 183 (11), 202 (8).

The spectroscopic data correspond to those reported in the literature.<sup>1</sup>

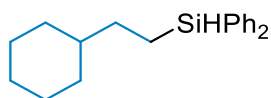

**3m** : The desired product was purified by Kugelrohr distillation (140 °C, 0.3 mmHg, 1 h), followed by column chromatography on silica gel using hexane/ethyl acetate (17:3) as the eluent. The desired product was obtained as a colorless oil in 52% yield (153 mg).

$^1\text{H-NMR}$  (400 MHz,  $\text{CDCl}_3$ )  $\delta$ : 7.58-7.57 (m, 4H), 7.41-7.36 (m, 6H), 4.85 (t, 1H,  $J = 3.7$  Hz), 1.74-1.67 (m, 5H), 1.37-1.36 (m, 2H), 1.29-1.11 (m, 6H), 0.90-0.87 (m, 2H);  $^{13}\text{C-NMR}$  (100 MHz,  $\text{CDCl}_3$ )  $\delta$ : 135.11 (CH), 134.72 (C), 129.43 (CH), 127.92 (CH), 40.46 (CH), 32.89 ( $\text{CH}_2$ ), 31.82 ( $\text{CH}_2$ ), 26.73 ( $\text{CH}_2$ ), 26.38 ( $\text{CH}_2$ ), 9.17 ( $\text{CH}_2$ ); GC-MS (EI)  $m/z$  (relative intensity) 293 (0.2)  $[\text{M-H}]^+$ , 182 (100), 216 (53), 188 (42), 138 (41), 104 (37).

The spectroscopic data correspond to those reported in the literature.<sup>2</sup>

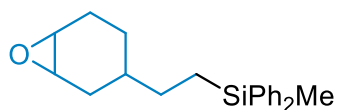

**3n** : The desired product was purified by Kugelrohr distillation (130 °C, 0.3 mmHg, 1 h), followed by column chromatography on silica gel using hexane/ethyl acetate (10:1) as the eluent. The desired product was obtained as a colorless oil in 47% yield (152 mg).

$^1\text{H-NMR}$  (400 MHz,  $\text{CDCl}_3$ )  $\delta$ : 7.52-7.50 (m, 4H), 7.39-7.34 (m, 6H), 3.16-3.13 (m, 2H), 2.18-2.01 (m, 2H, overlapping signals), 1.81-1.71 (m, 1H), 1.53-1.25 (m, 6H), 1.06-1.05 (m, 2H), 0.55 (s, 3H);  $^{13}\text{C-NMR}$  (100 MHz,  $\text{CDCl}_3$ )  $\delta$ : 137.13 (C), 134.37 (CH), 129.09 (CH), 127.78 (CH), 53.25 (CH), 52.71 (CH), 51.97 (CH), 51.87 (CH), 35.45 (CH), 32.51 (CH), 31.49 ( $\text{CH}_2$ ), 30.58 ( $\text{CH}_2$ ), 30.25 ( $\text{CH}_2$ ), 30.05 ( $\text{CH}_2$ ), 26.65 ( $\text{CH}_2$ ), 25.27 ( $\text{CH}_2$ ), 23.88 ( $\text{CH}_2$ ), 23.56 ( $\text{CH}_2$ ), 11.05 ( $\text{CH}_2$ ), 10.89 ( $\text{CH}_2$ ), -4.62 ( $\text{CH}_3$ ), -4.64 ( $\text{CH}_3$ ); IR (neat,  $\text{cm}^{-1}$ ) 701, 734, 881, 1111, 1254, 1428, 2917, 3067; HRMS (APCI)  $m/z$  Calcd for  $\text{C}_{21}\text{H}_{26}\text{OSi}$   $[\text{M+H}]^+$  323.1826, found 323.1822.

## 18. NMR-Spectra

### 3a <sup>1</sup>H-NMR (400 MHz, CDCl<sub>3</sub>)

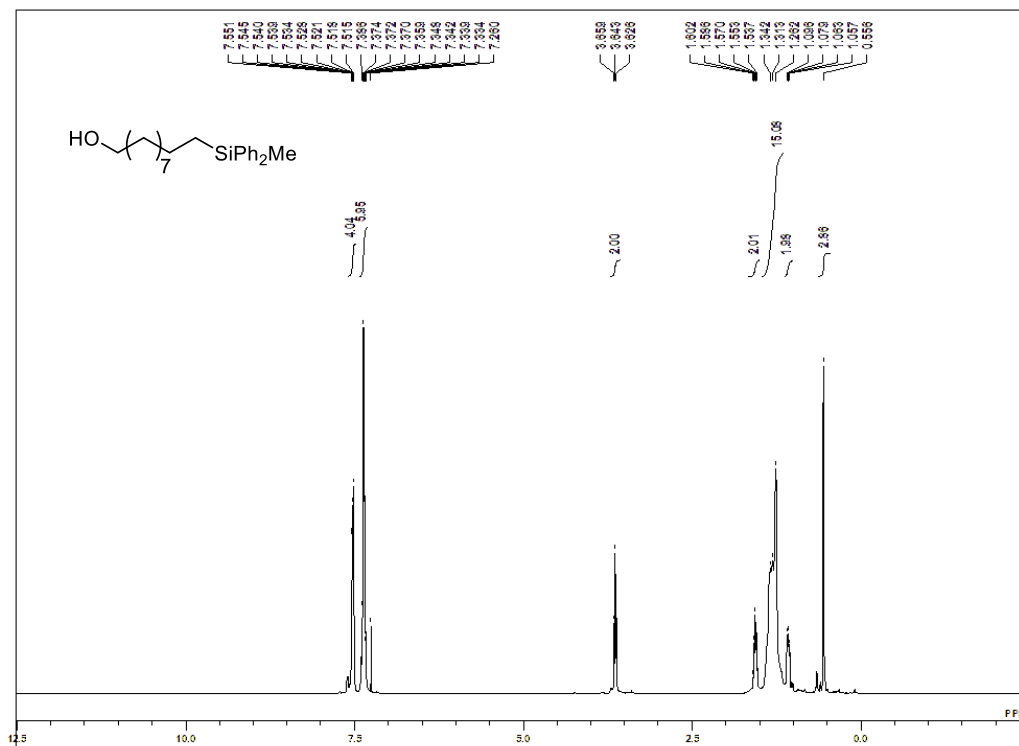

### <sup>13</sup>C-NMR (100 MHz, CDCl<sub>3</sub>)

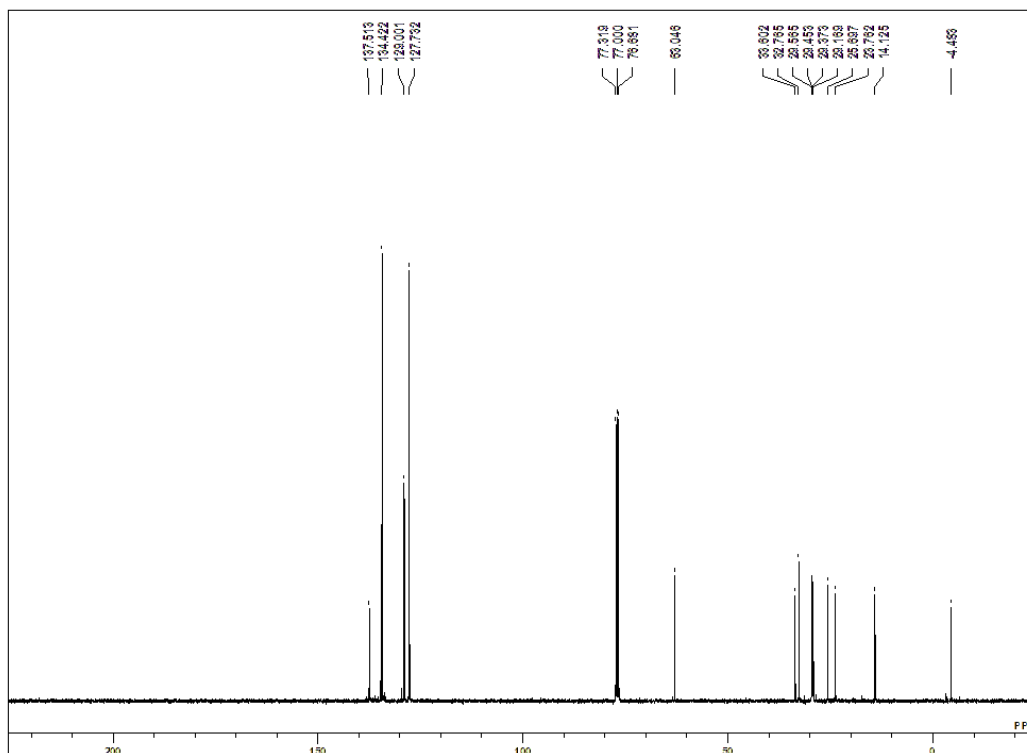

**3b**  $^1\text{H-NMR}$  (400 MHz,  $\text{CDCl}_3$ )

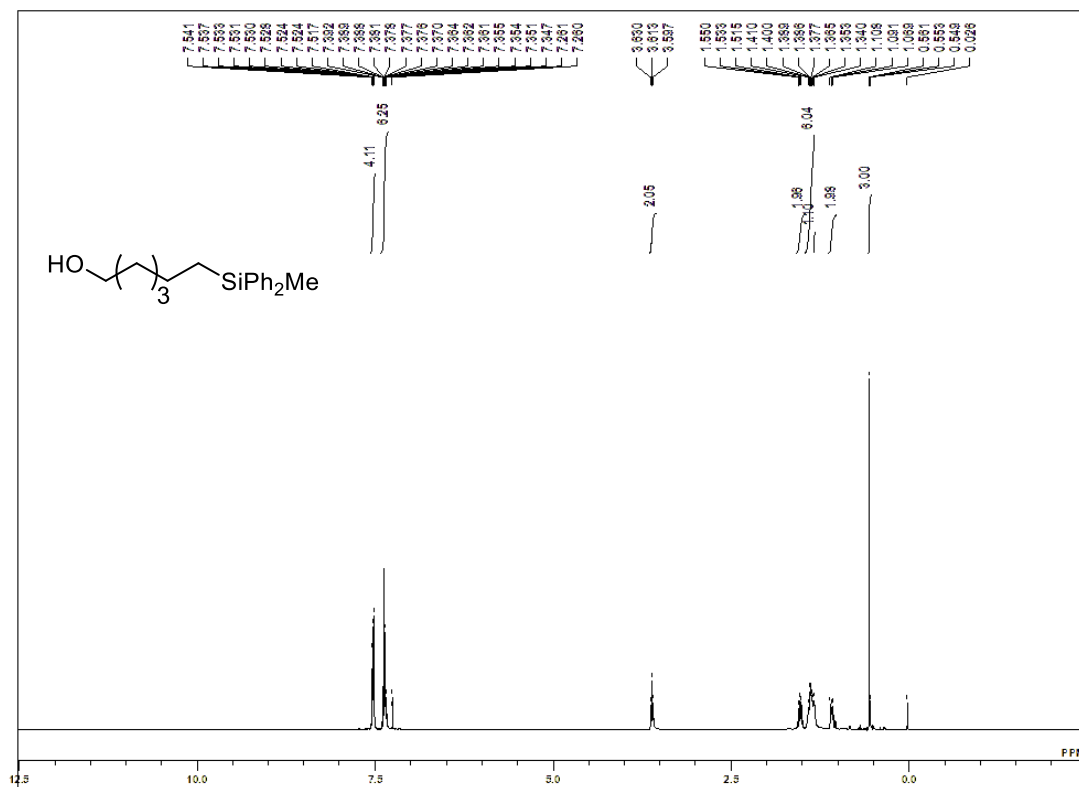

$^{13}\text{C-NMR}$  (100 MHz,  $\text{CDCl}_3$ )

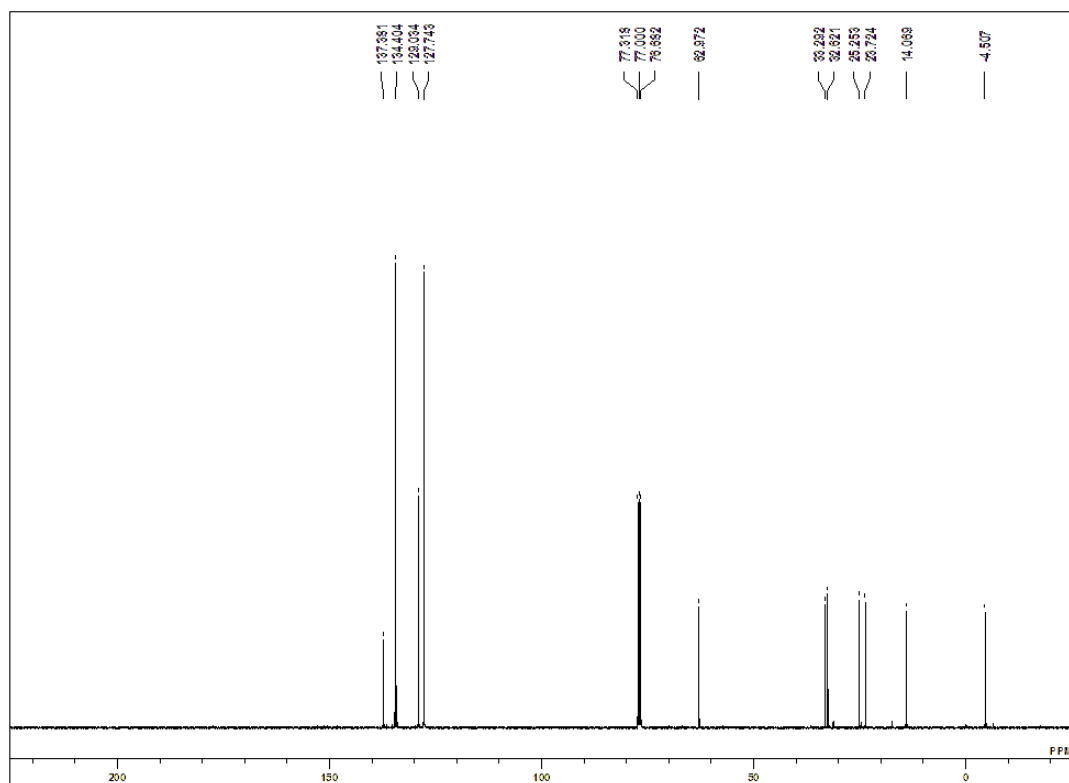

3c <sup>1</sup>H-NMR (400 MHz, CDCl<sub>3</sub>)

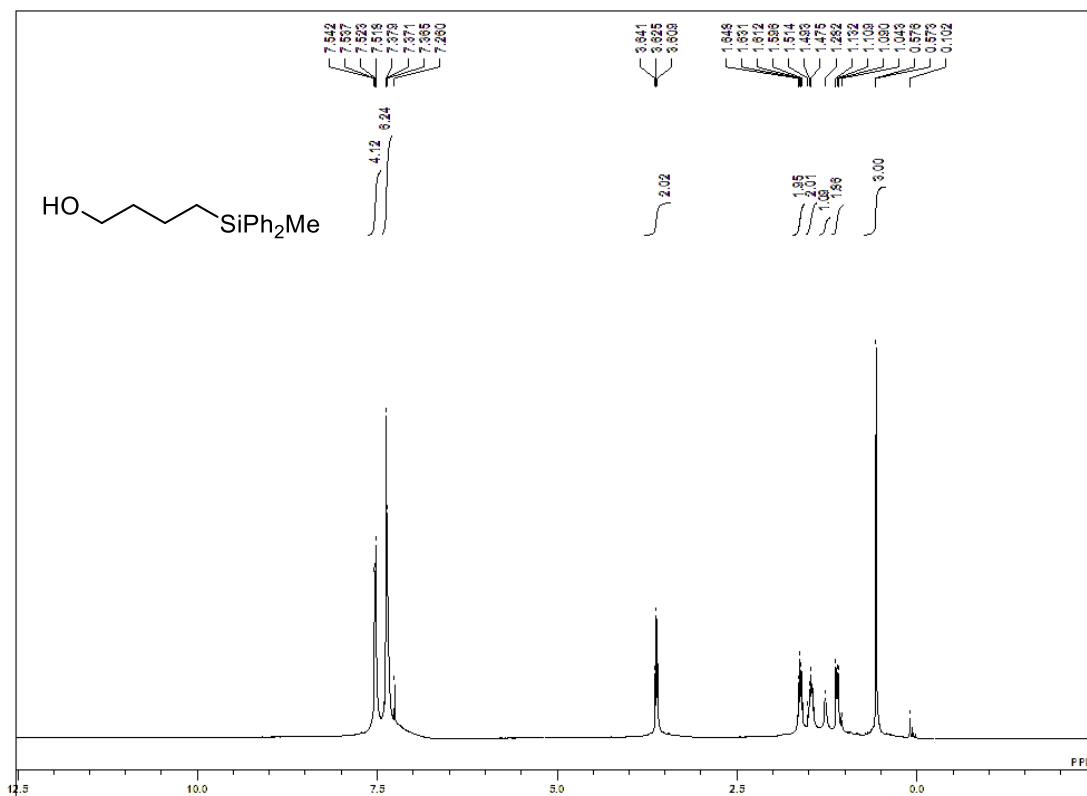

<sup>13</sup>C-NMR (100 MHz, CDCl<sub>3</sub>)

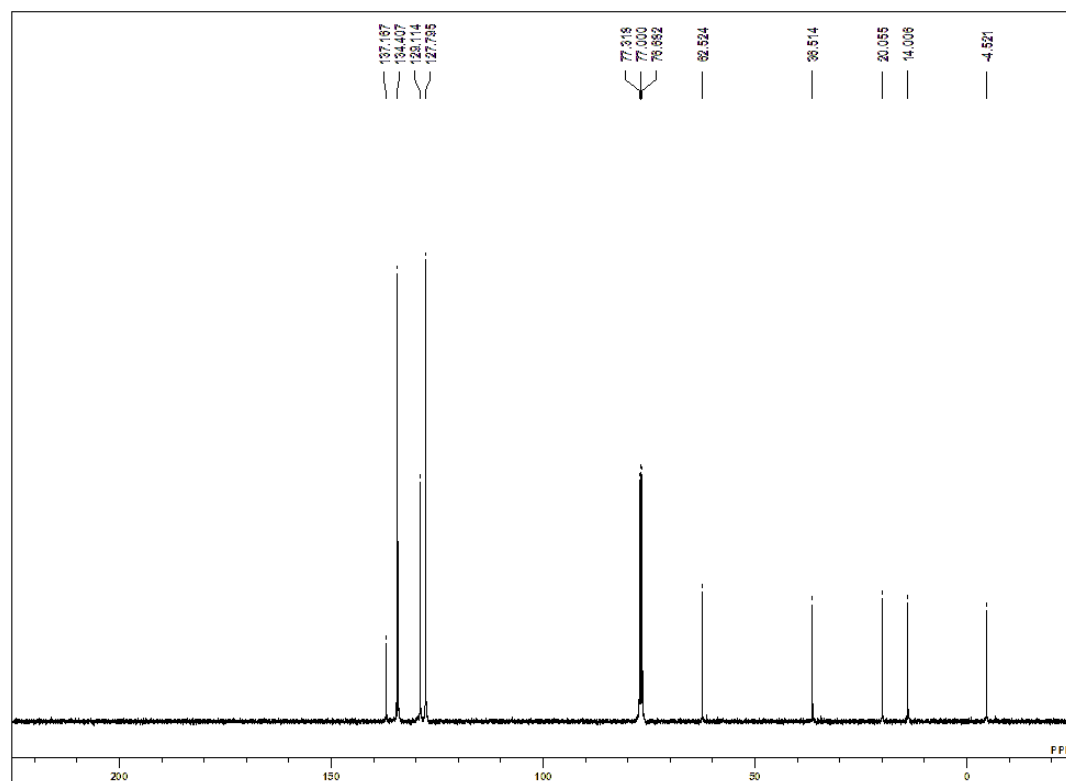



3e <sup>1</sup>H-NMR (400 MHz, CDCl<sub>3</sub>)

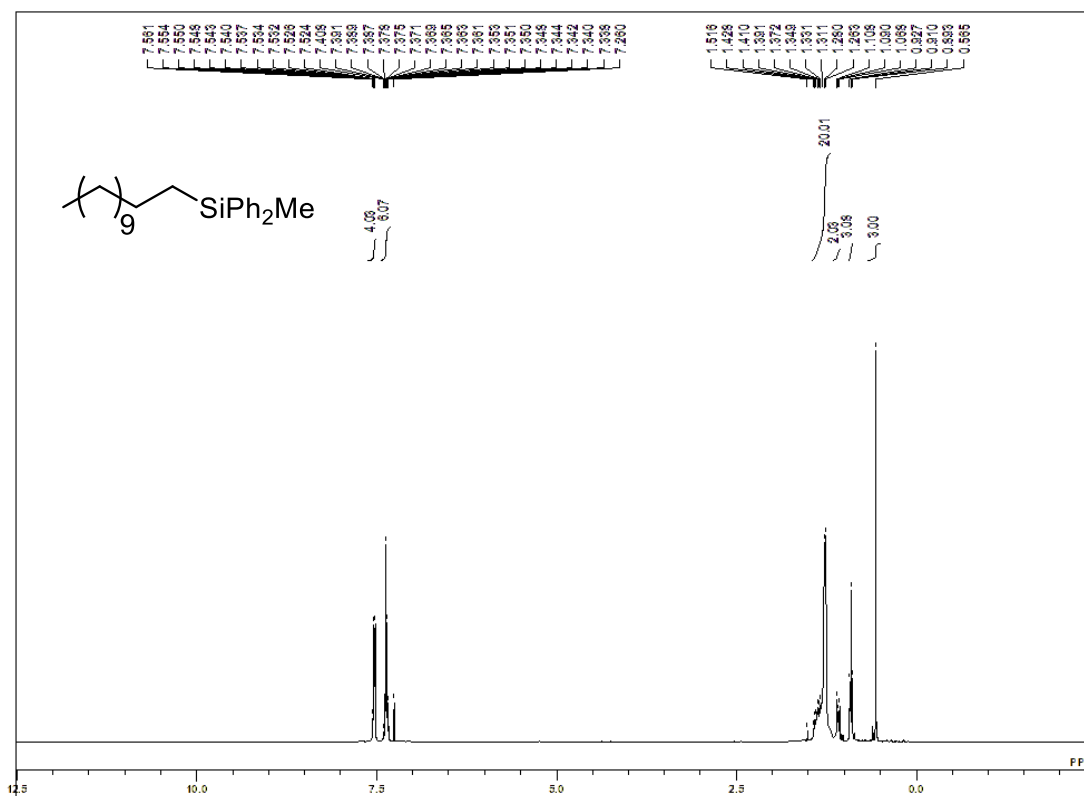

<sup>13</sup>C-NMR (100 MHz, CDCl<sub>3</sub>)

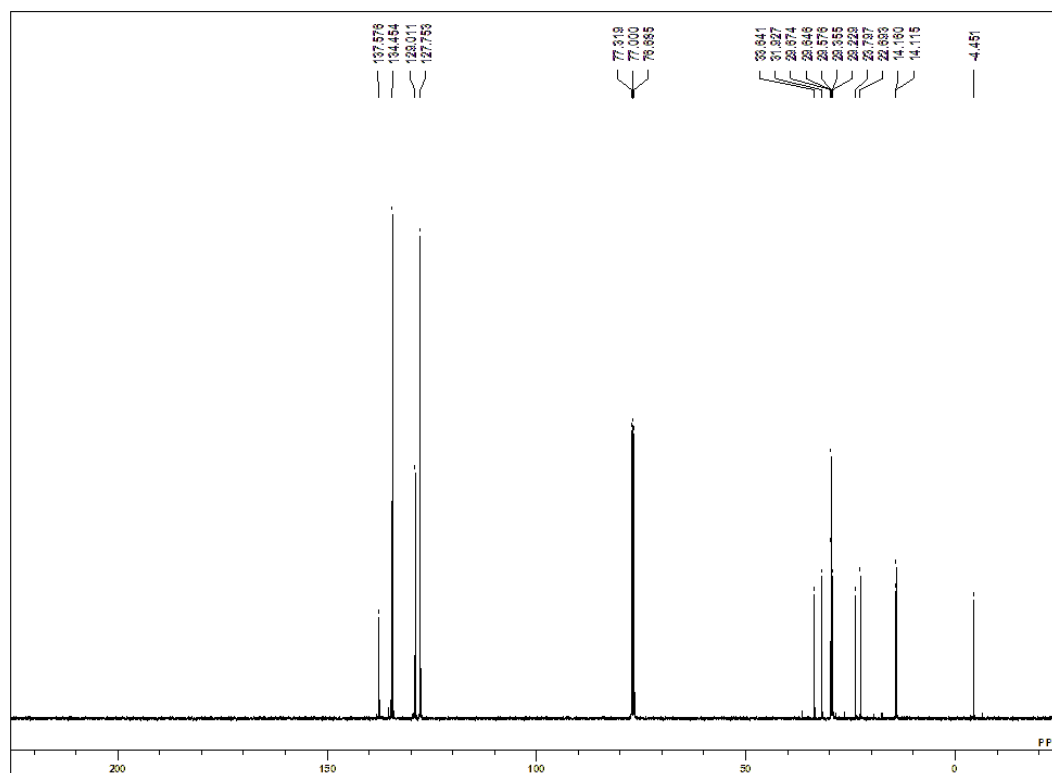



3g <sup>1</sup>H-NMR (400 MHz, CDCl<sub>3</sub>)

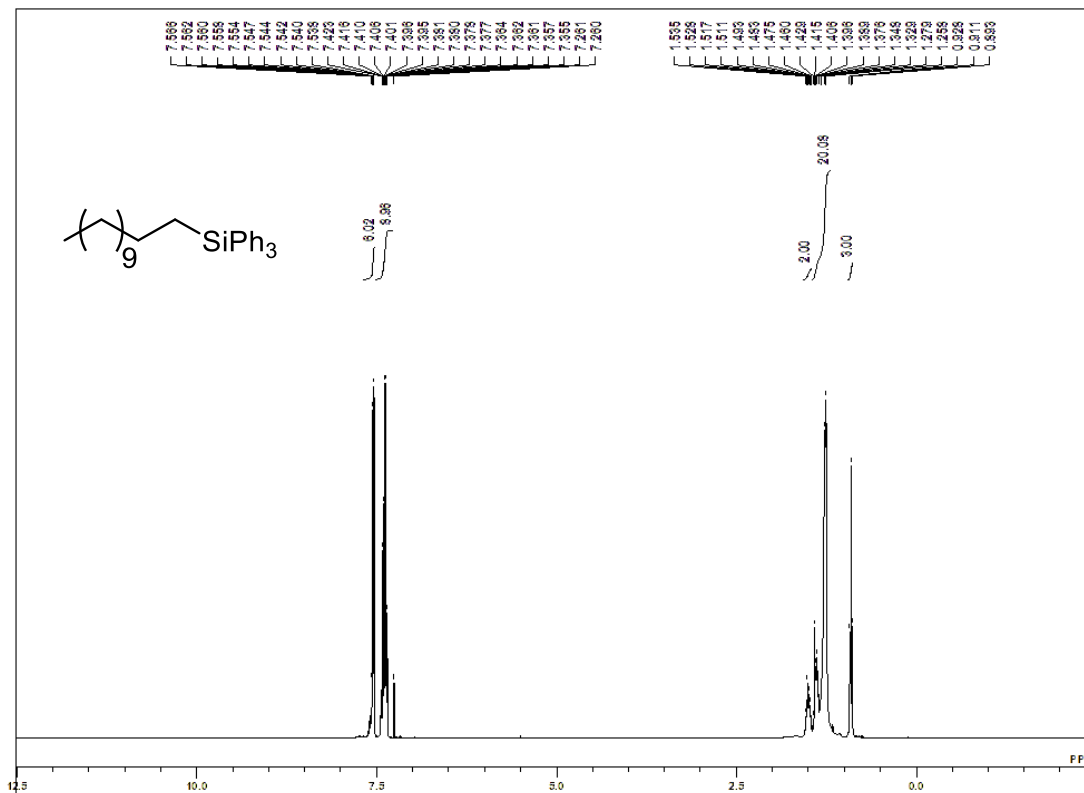

<sup>13</sup>C-NMR (100 MHz, CDCl<sub>3</sub>)

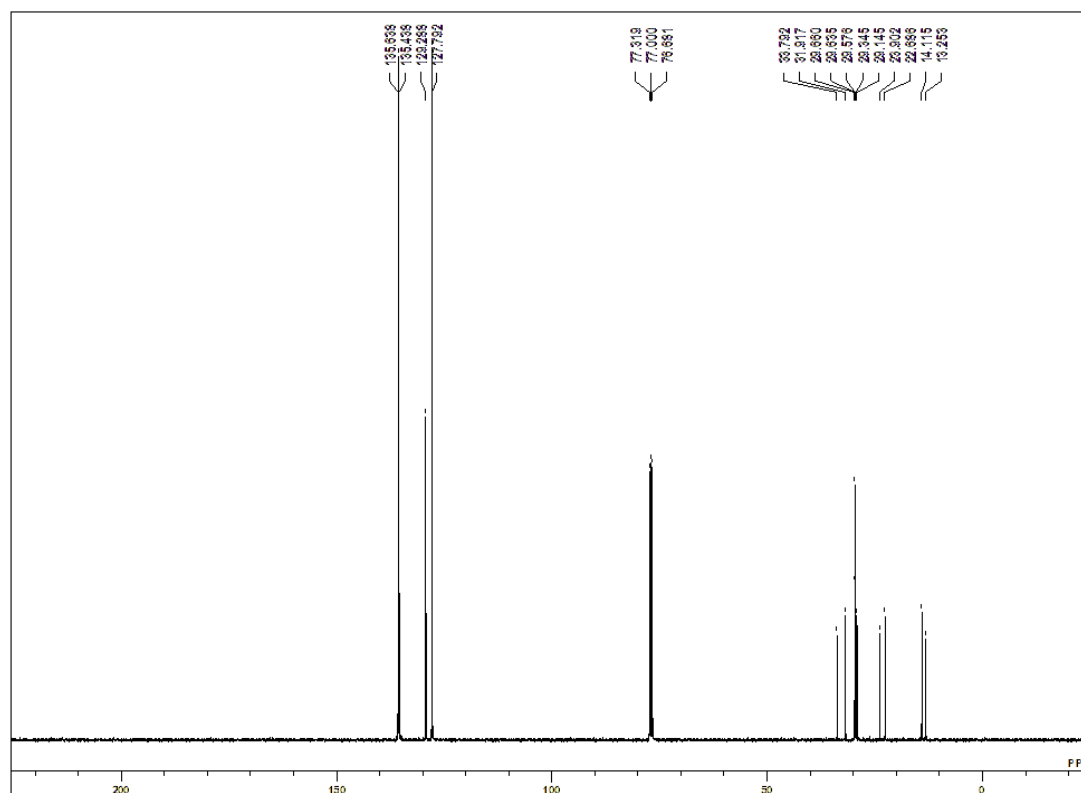

**3h**  $^1\text{H-NMR}$  (400 MHz,  $\text{CDCl}_3$ )

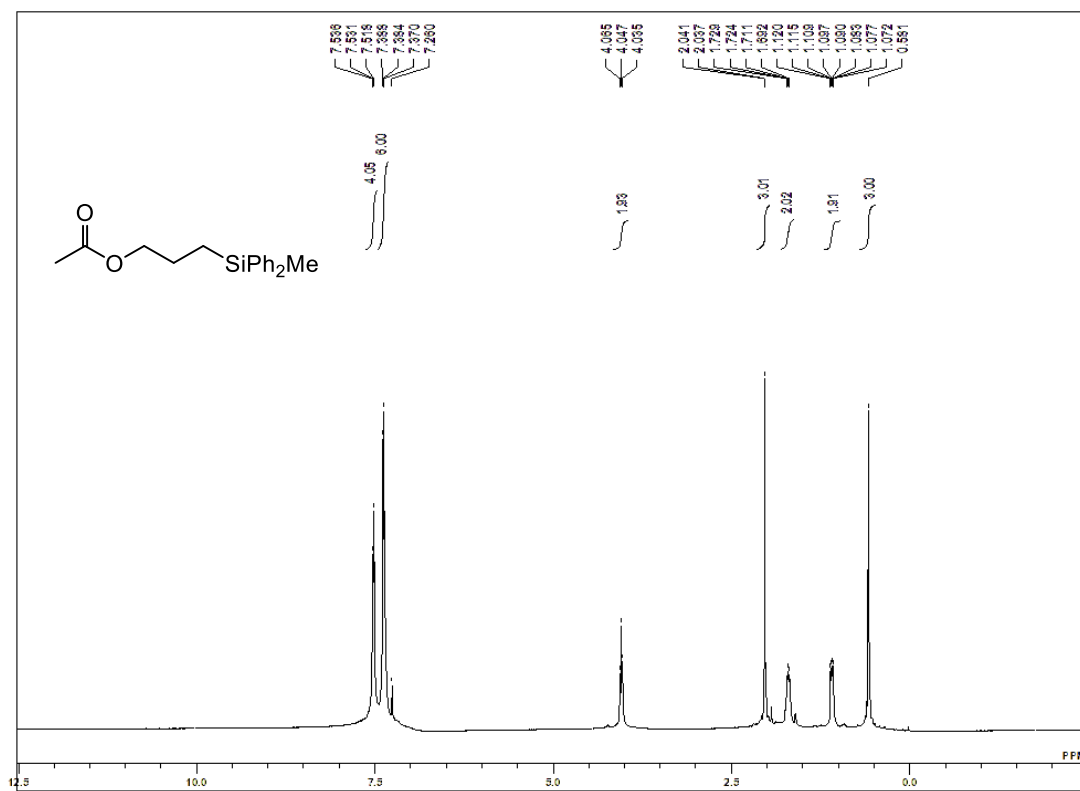

$^{13}\text{C-NMR}$  (100 MHz,  $\text{CDCl}_3$ )

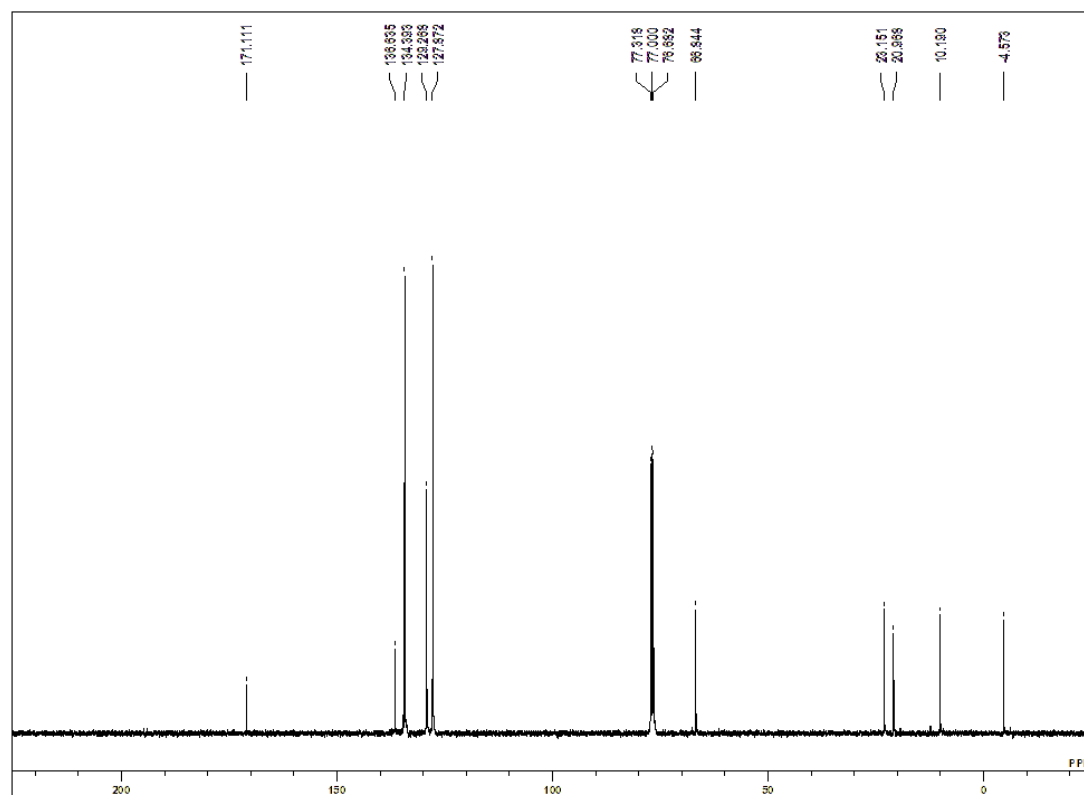

3i <sup>1</sup>H-NMR (400 MHz, CDCl<sub>3</sub>)

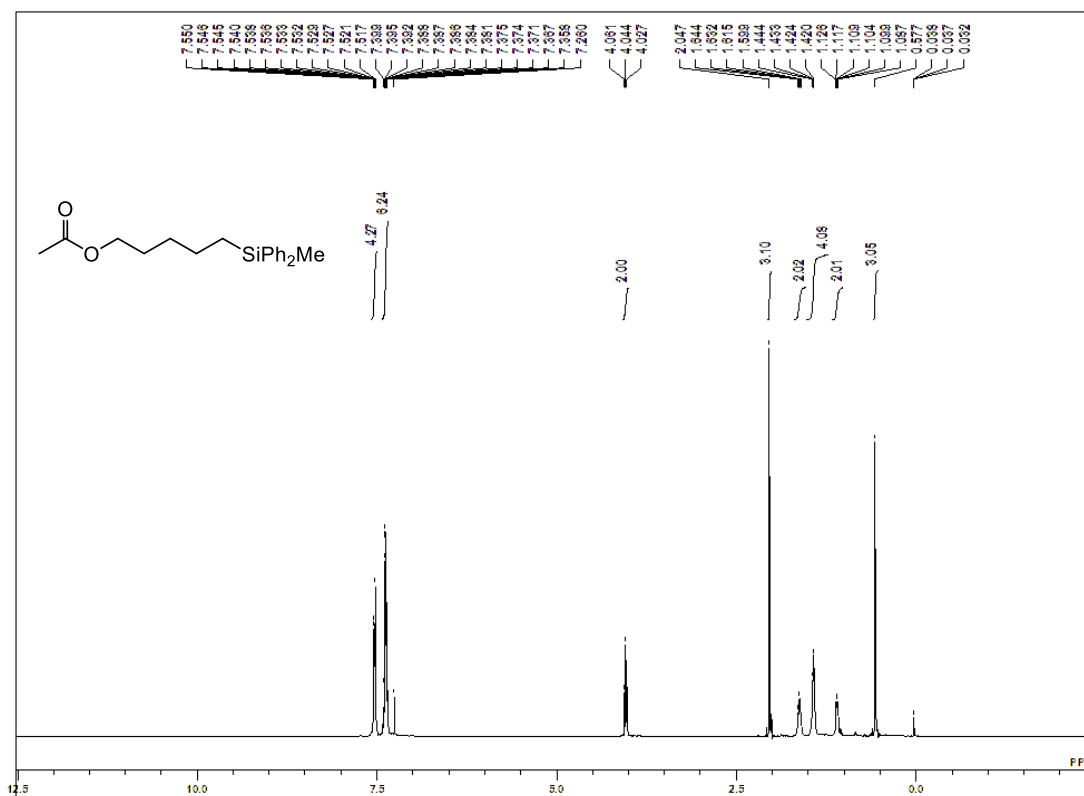

<sup>13</sup>C-NMR (100 MHz, CDCl<sub>3</sub>)

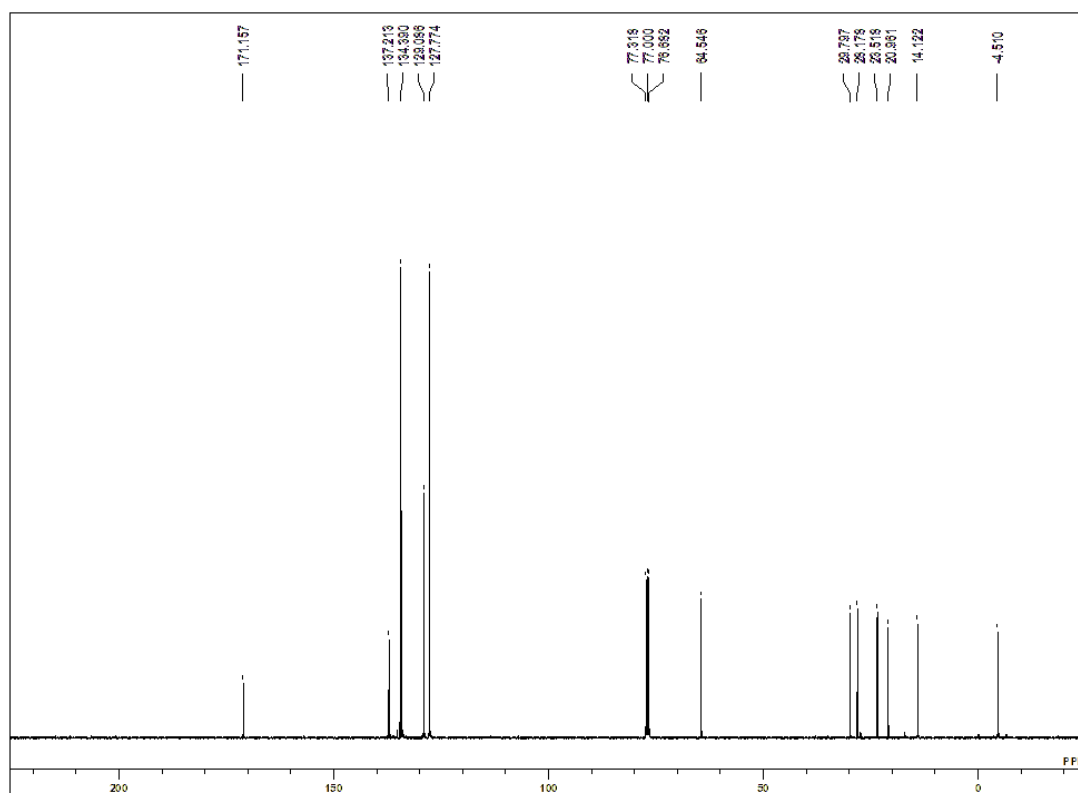

3j <sup>1</sup>H-NMR (400 MHz, CDCl<sub>3</sub>)

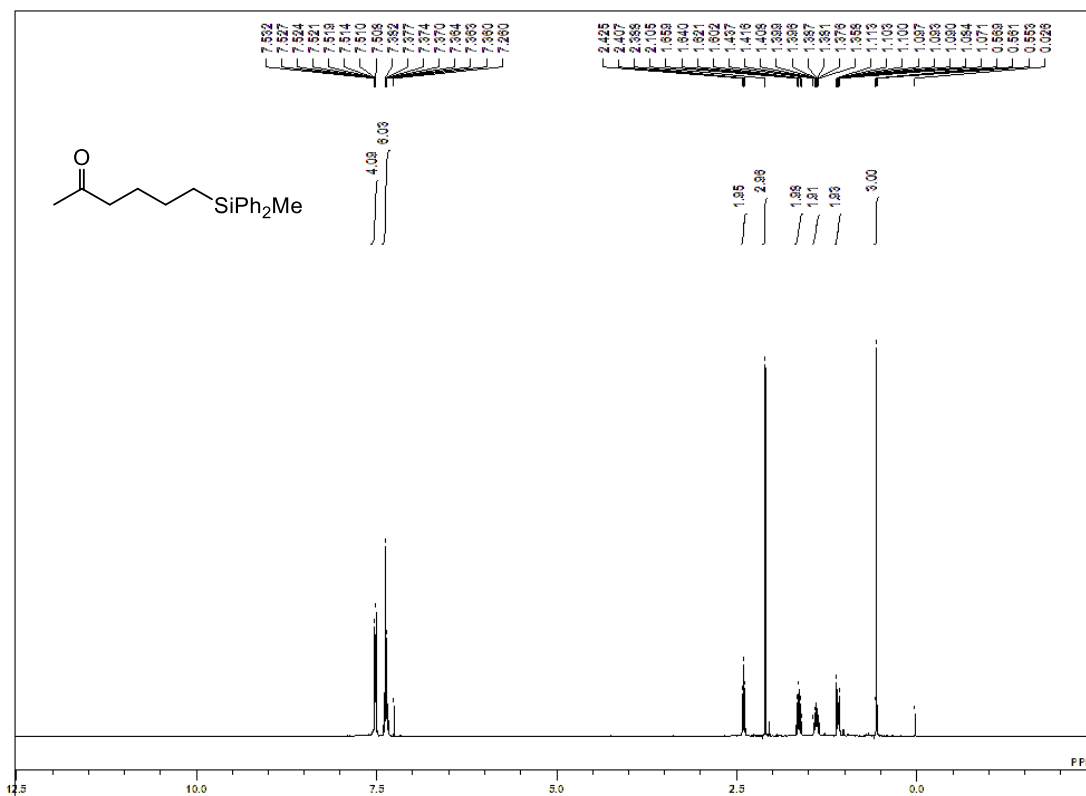

<sup>13</sup>C-NMR (100 MHz, CDCl<sub>3</sub>)

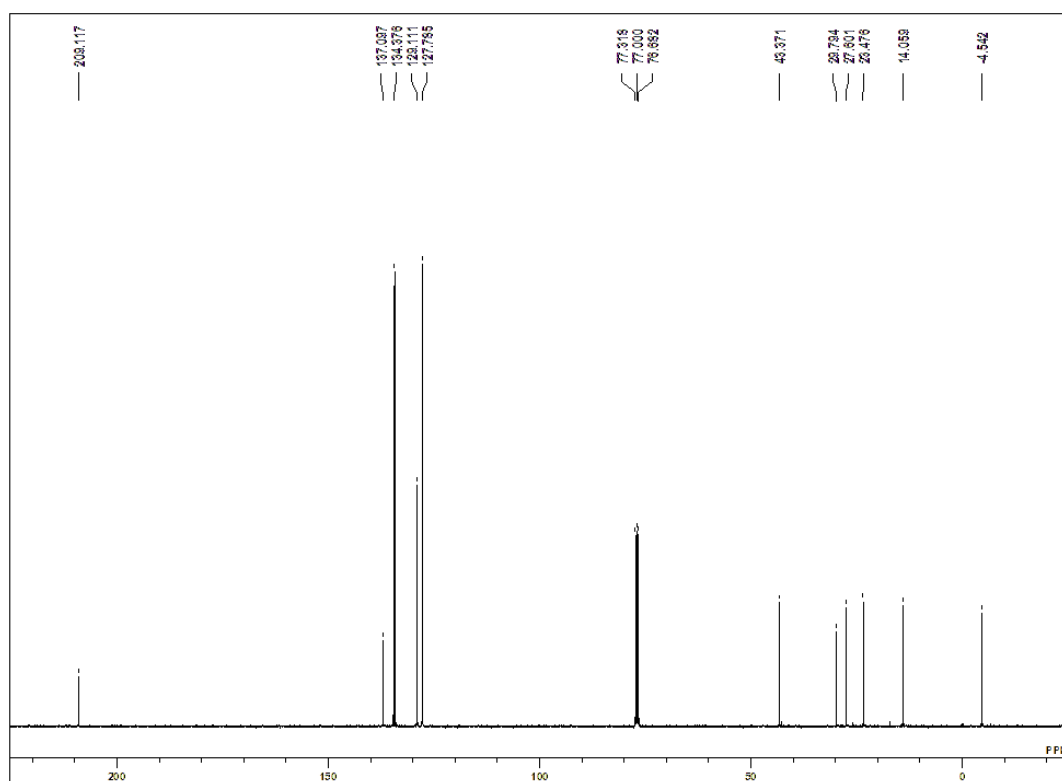



31 <sup>1</sup>H-NMR (400 MHz, CDCl<sub>3</sub>)

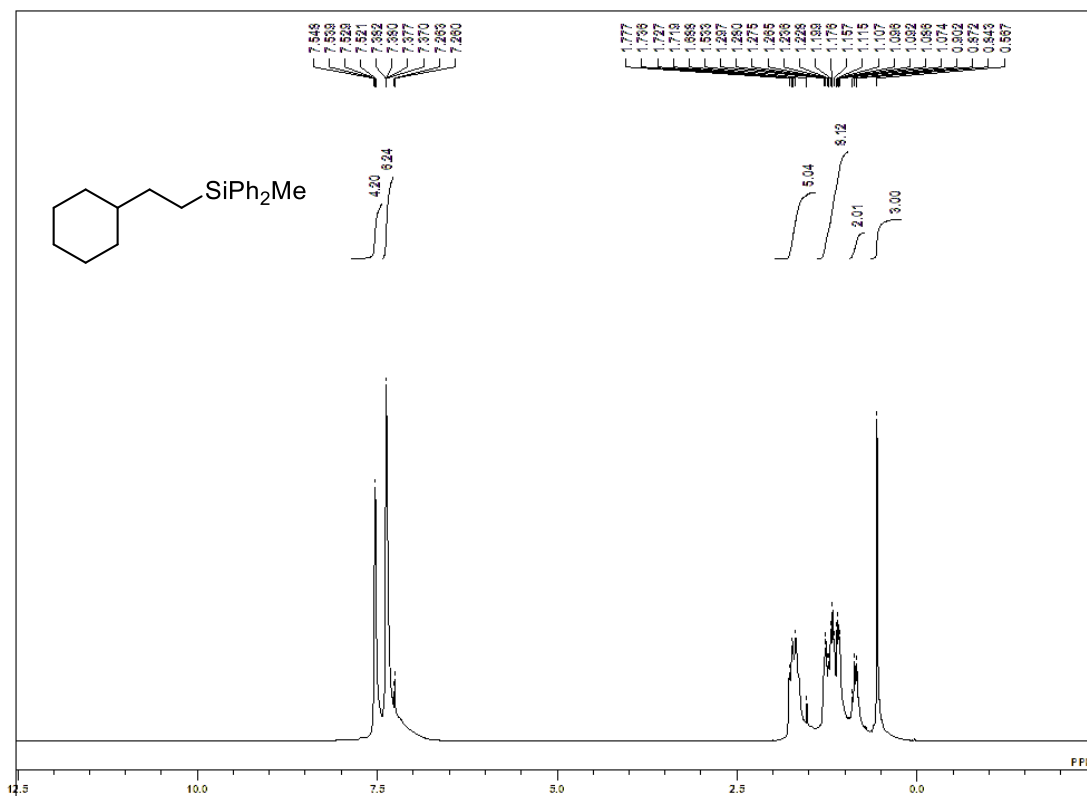

<sup>13</sup>C-NMR (100 MHz, CDCl<sub>3</sub>)

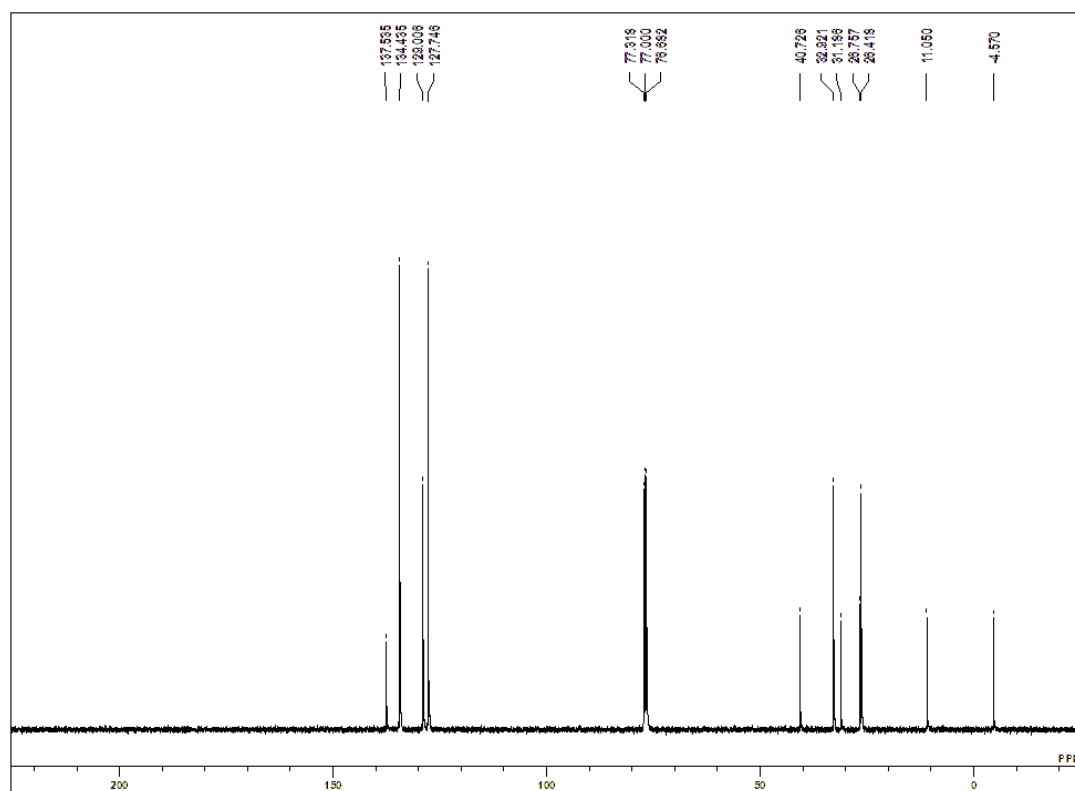

3m <sup>1</sup>H-NMR (400 MHz, CDCl<sub>3</sub>)

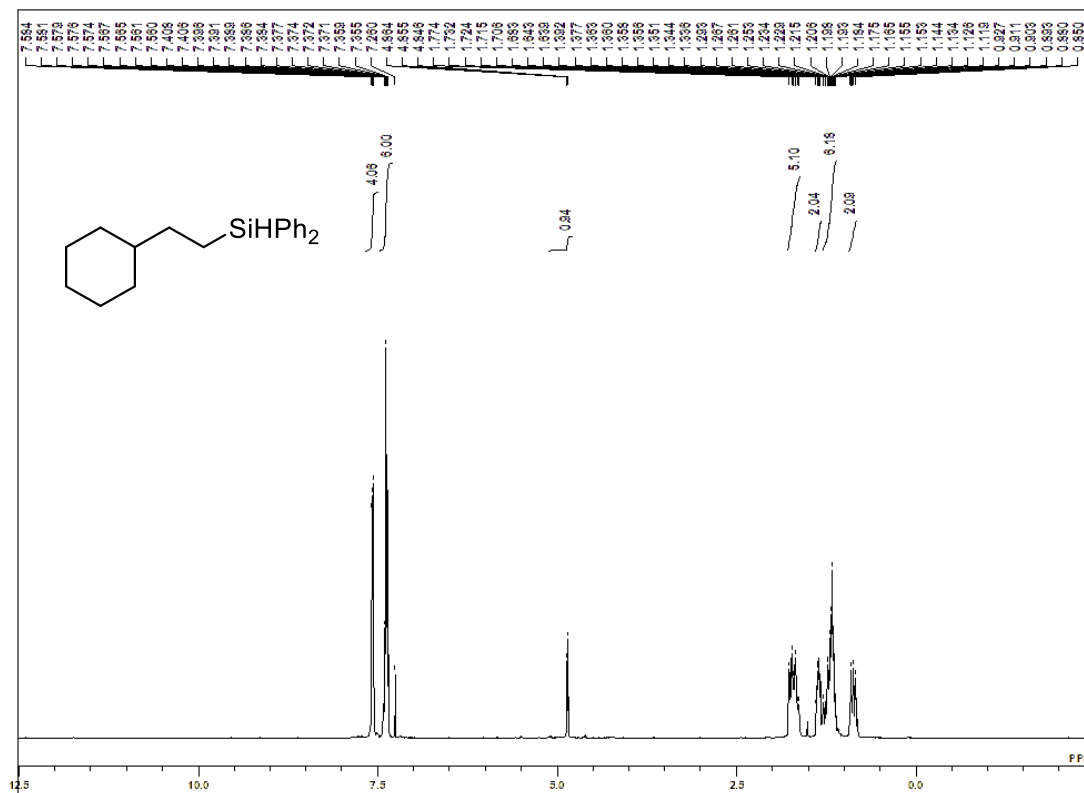

<sup>13</sup>C-NMR (100 MHz, CDCl<sub>3</sub>)

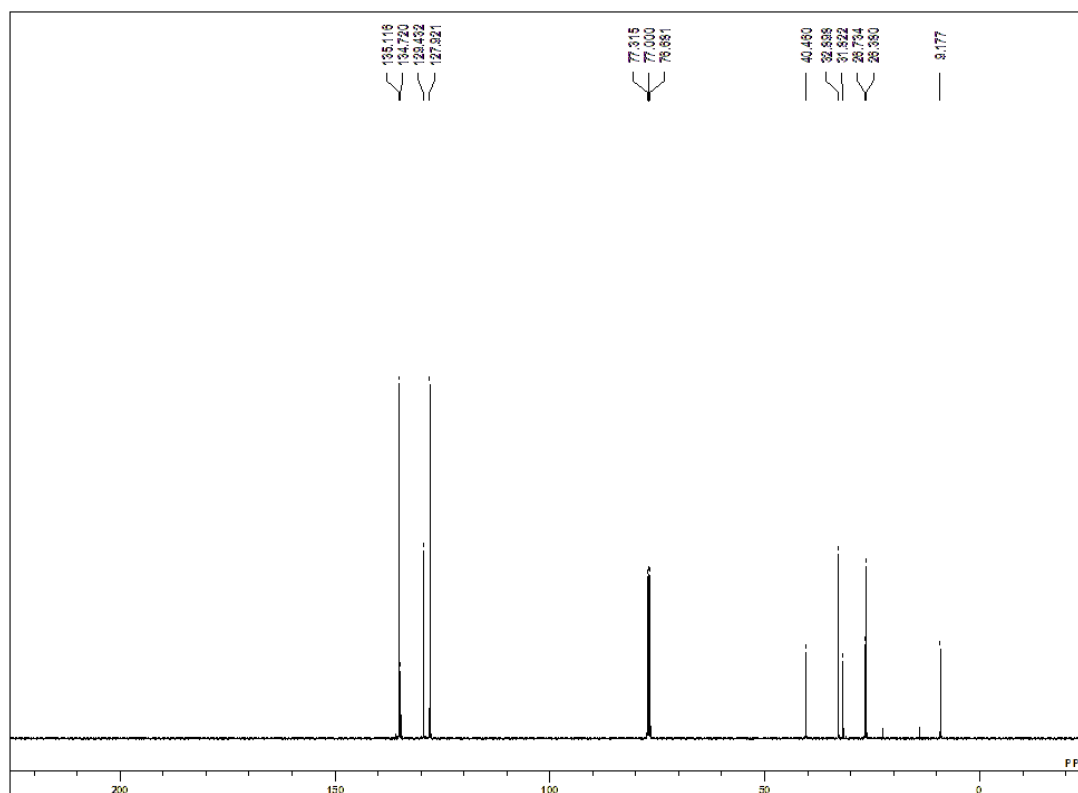

**3n** <sup>1</sup>H-NMR (400 MHz, CDCl<sub>3</sub>)

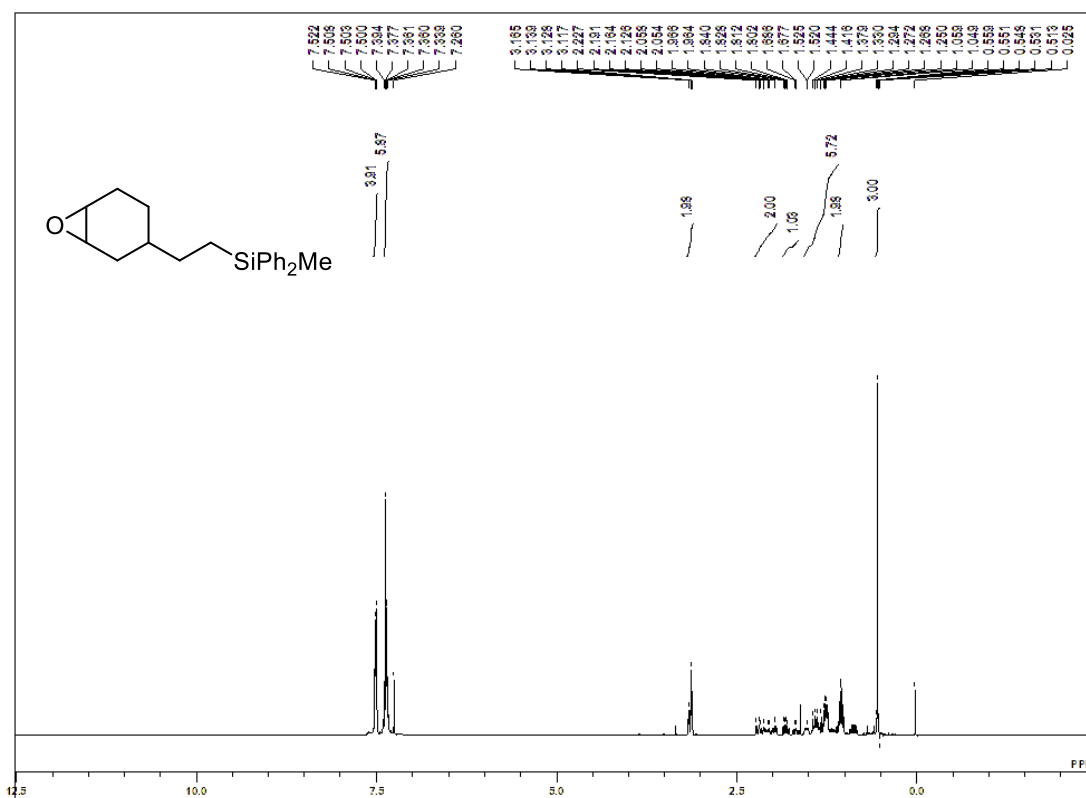

**3n** <sup>13</sup>C-NMR (100 MHz, CDCl<sub>3</sub>)

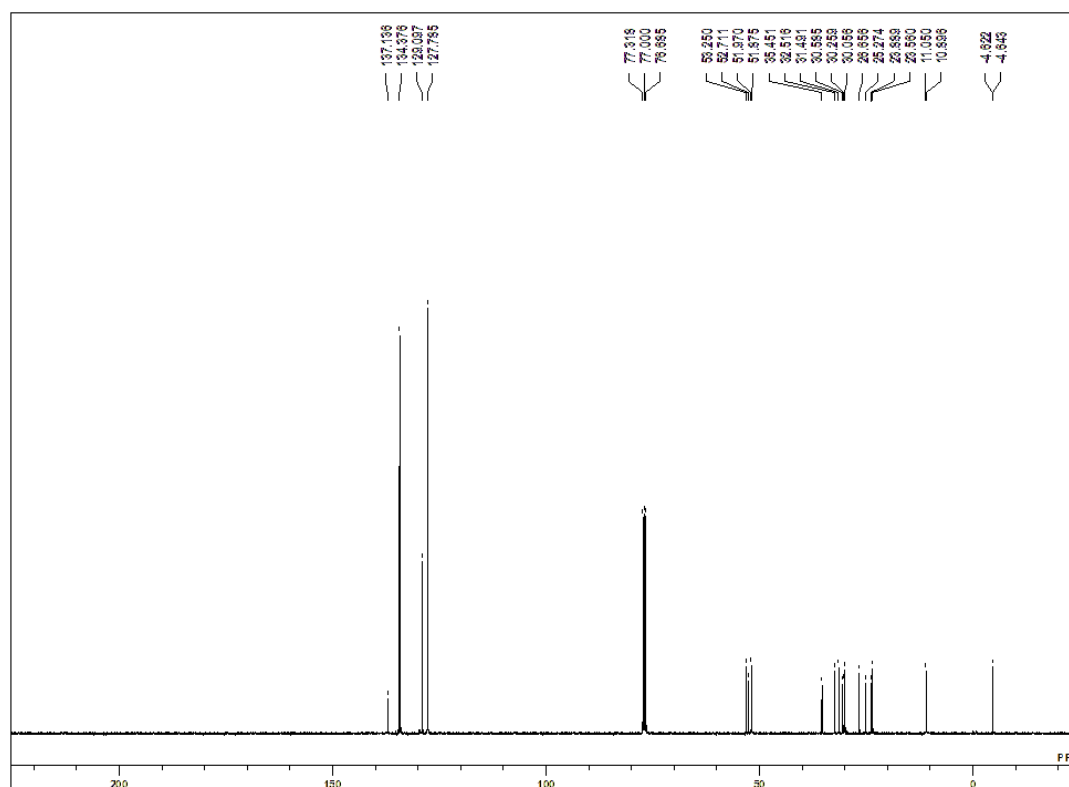

## 19. References

1. N. Katayama, K. Tabaru, T. Nagata, M. Yamaguchi, T. Suzuki, T. Toyao, Y. Jing, Z. Maeno, K.-I. Shimizu, T. Watanabe and Y. Obora, *RSC Adv.*, 2025, **15**, 1776.
2. Y. F. Gao, L. J. Wang and L. Deng, *ACS Catal.*, 2018, **8**, 9637.
3. T. Watanabe, T. Kawamoto, K. Suda, C. Pondchanok, Y. Hiraoka, I. Hirosawa and J. Inukai, *ECS Trans.*, 2020, **98**, 477-486.
4. K. Tabaru, T. Fujihara, K. Torii, T. Suzuki, Y. Jing, T. Toyao, Z. Maeno, K.-I. Shimizu, T. Watanabe, H. Sogawa, F. Sanda, J. Y. Hasegawa and Y. Obora, *J. Am. Chem. Soc.*, 2024, **146**, 22993-23003.
5. B. Ravel and M. Newville, *J. Synchrotron Radiat.*, 2005, **12**, 537-541.
6. A. Sangsuwan, H. Kawasaki, Y. Matsumura and Y. Iwasaki, *Bioconjugate Chem.*, 2016, **27**, 2527.
